# Supplementary material for: Near-global distributions of overshooting tops derived from Terra and Aqua MODIS observations
Source: Copernicus journal article supplement (doi:10.5194/amt-16-1391-2023), 2023-03-16
Supplement: Supplementary file 1 [file amt-16-1391-2023-supplement.zip]

Archive with 4 entries (4 files):
- File S3.txt
- File S2.txt
- File S1.docx
- amt-16-1391-2023-supplement-title-page.pdf
