# Supplementary material for: Near-global distributions of overshooting tops derived from Terra and Aqua MODIS observations
Source: Copernicus journal article supplement (doi:10.5194/amt-16-1391-2023), 2023-03-16
Supplement: Supplementary file 1 [file amt-16-1391-2023-supplement.zip › amt-16-1391-2023-supplement-title-page.pdf]

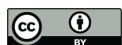

*Supplement of*

## **Near-global distributions of overshooting tops derived from Terra and Aqua MODIS observations**

**Yulan Hong et al.**

*Correspondence to:* Yulan Hong (yulanh@illinois.edu)

- amt-16-1391-2023-supplement-title-page.pdf
- File S1.docx
- File S2.txt
- File S3.txt

The copyright of individual parts of the supplement might differ from the article licence.
