# Supplementary material for: Near-global distributions of overshooting tops derived from Terra and Aqua MODIS observations
Source: Copernicus journal article supplement (doi:10.5194/amt-16-1391-2023), 2023-03-16
Supplement: Supplementary file 1 [file amt-16-1391-2023-supplement.zip › File S2.txt]

lat	lon	time(yeardayhhmm)	OTflag(1-OT	0-NOT)	Tb11	Tb6.7	tropopause temperature
3.2803	143.5303	20070041610	1.0	179.1458	182.5293	185.7721
-14.0518	-56.3911	20070140520	1.0	176.7366	182.0515	190.8119
-16.2662	25.0851	20070181212	1.0	191.1708	193.9069	193.1859
-15.4271	24.8966	20070181212	0.0	191.4222	194.7234	193.0688
-20.7785	40.0221	20070191115	1.0	187.8721	192.1417	190.509
-20.5377	39.9659	20070191115	1.0	188.6136	191.3184	190.7043
-20.2487	39.8985	20070191115	1.0	188.5892	194.4643	190.5481
-4.3464	-179.9335	20070240145	1.0	183.6198	188.2442	190.5698
-12.7951	-164.2836	20070241233	1.0	180.4577	187.0786	189.0531
-14.6866	-164.7027	20070241233	0.0	186.1093	189.8029	189.5375
27.233	-138.4211	20070271114	0.0	221.5326	222.3414	224.3439
27.1945	-138.4307	20070271114	0.0	220.61	221.9871	224.3439
26.8671	-138.5128	20070271114	1.0	219.8584	220.9871	225.4865
26.6649	-138.5634	20070271114	0.0	219.3349	220.4636	225.6545
5.2565	137.8315	20070300428	1.0	185.3961	189.7123	193.7913
-3.5183	142.7858	20070320414	1.0	188.882	194.4643	192.9222
-10.0824	60.324	20070322136	1.0	186.318	191.4856	186.7279
-5.047	96.7547	20070340719	1.0	183.6198	189.839	192.3886
-8.6754	-63.0062	20070490550	1.0	184.3408	189.3273	193.007
-2.6478	8.148	20070491312	1.0	188.7846	192.2866	192.7894
37.9418	12.4272	20070501228	1.0	215.7903	217.3751	219.3805
37.9705	12.4185	20070501228	0.0	218.9326	220.7568	219.3805
38.0854	12.3837	20070501228	1.0	214.6957	216.1877	219.3805
-3.0715	-27.815	20070550332	1.0	187.8971	189.5299	197.9292
2.5356	147.9667	20071591553	0.0	193.3126	194.2753	191.0211
2.0908	147.8722	20071591553	1.0	185.3961	188.9915	191.0133
50.8007	32.5744	20071621053	1.0	209.92	212.078	214.5014
10.8739	-5.5599	20071621359	1.0	176.9073	182.5293	195.0157
63.3747	88.546	20071630643	0.0	222.298	224.4265	220.1856
63.6412	88.3265	20071630643	1.0	219.908	222.2126	221.3448
52.0147	-93.3363	20071630839	0.0	208.9048	211.4282	207.4027
51.4002	-93.6125	20071630839	1.0	203.9075	206.9894	207.2035
10.3886	7.5044	20071632520	1.0	191.102	192.7466	202.1885
46.9692	-101.6494	20072390904	1.0	211.0176	212.8934	219.3336
12.6131	100.6536	20072391907	1.0	187.4707	191.6351	192.9343
3.5344	112.6031	20072401814	1.0	192.1443	194.937	196.4149
3.4376	112.5825	20072401814	0.0	191.3766	194.7091	196.4149
17.7244	102.5805	20072410642	1.0	186.6804	189.947	192.9033
43.6567	-36.4087	20072420439	1.0	213.967	216.1048	220.434
18.1423	64.8486	20071672134	1.0	187.1667	188.4771	190.9078
18.0651	64.831	20071672134	1.0	182.4815	187.1612	190.9078
17.8238	64.7761	20071672134	1.0	186.4478	188.9915	190.9078
15.0153	101.6862	20071680647	1.0	186.8347	192.4304	192.4205
2.8082	19.3472	20071691224	1.0	191.0101	195.7435	192.0281
19.8866	131.6861	20071701708	1.0	191.5132	192.6365	194.461
9.0268	93.7361	20071711933	1.0	182.5393	184.5646	192.5977
54.5583	121.1097	20071721825	1.0	212.8048	216.2823	217.6185
46.1424	102.4324	20071740619	1.0	208.6285	212.2842	217.3727
25.7061	65.0926	20071742138	1.0	187.7471	191.4523	194.0595
19.805	99.0602	20071750654	1.0	188.2447	193.6077	192.5985
13.1334	-96.9559	20071760819	1.0	191.3081	192.9341	198.7348
35.7249	123.3715	20071781753	1.0	196.6698	198.5119	201.7146
51.392	43.9121	20071792329	1.0	213.5779	214.5533	218.6773
55.2386	86.1053	20071820711	1.0	218.4893	221.3785	222.5116
55.8825	91.9534	20071860647	1.0	212.6061	215.6196	218.691
56.0703	91.8522	20071860647	1.0	213.745	216.9005	218.691
36.2385	-98.2575	20071861952	1.0	201.8731	203.6741	216.7932
63.1729	40.8396	20071880954	1.0	214.9953	217.4996	222.7163
31.0447	-90.6287	20071901926	0.0	202.6139	205.1077	204.8263
32.4671	-91.0101	20071901926	1.0	197.5815	202.456	209.6661
50.5226	23.4691	20071902450	0.0	219.222	221.599	226.5665
49.1769	22.904	20071902450	1.0	217.9525	218.5626	220.276
34.1633	-74.8107	20071950704	1.0	192.9635	197.1195	198.9992
8.7137	-74.7175	20071990647	1.0	184.3957	189.4932	198.8761
8.6267	-74.7363	20071990647	0.0	192.0548	195.4964	198.8761
58.2841	87.4989	20072000659	1.0	214.3395	216.7038	219.0888
58.8161	87.173	20072000659	1.0	211.2956	212.9802	219.5493
55.9407	64.1121	20072000838	1.0	217.901	220.5245	231.689
-34.0069	-134.3672	20072002302	1.0	211.3831	214.3006	213.1006
29.3016	161.6597	20072010238	1.0	197.444	199.6291	201.6039
-36.0927	104.9697	20072011818	1.0	222.5588	224.3287	229.7264
60.4083	120.1128	20072060444	1.0	215.1038	215.6799	222.8401
3.9006	-77.3107	20072060655	1.0	192.9854	193.7129	200.8226
2.8176	-77.541	20072060655	0.0	194.8267	198.4273	200.6195
2.6919	-77.5677	20072060655	0.0	197.009	198.6561	200.4711
2.5372	-77.6005	20072060655	0.0	193.5293	196.2029	200.4711
2.0537	-77.7032	20072060655	1.0	194.1086	197.2474	200.432
1.9667	-77.7217	20072060655	0.0	194.1086	195.0782	200.432
1.9377	-77.7278	20072060655	1.0	192.3451	197.7518	200.432
55.0493	-73.315	20072070723	1.0	206.5683	209.367	212.4207
-30.9872	154.2623	20072081506	1.0	222.0122	223.3289	228.4255
10.0007	19.3509	20072101220	1.0	192.3451	196.7704	197.9613
24.8578	-107.6341	20072102038	1.0	191.2395	193.7429	198.1327
48.2858	47.5221	20072110955	1.0	208.1955	210.3814	215.655
-39.6023	59.0807	20072122119	1.0	224.3057	225.9395	232.4221
12.3627	-126.493	20072131016	1.0	189.652	191.0479	197.188
53.9204	72.8861	20072132136	1.0	210.6199	213.7362	215.0111
17.5458	87.2006	20072150744	1.0	185.1015	189.9828	192.8535
18.9019	89.7308	20072151955	1.0	179.4628	184.6117	196.6418
30.3414	-165.5101	20072171304	1.0	208.4279	210.7762	219.2931
16.1721	-6.6867	20072180219	1.0	188.1705	191.3184	193.9225
15.0131	-6.9458	20072180219	0.0	190.6401	194.9794	193.8522
38.8231	-99.7681	20072180848	1.0	194.2363	196.7834	197.9594
9.7329	-141.2928	20072182303	1.0	188.7846	190.9626	196.902
18.1107	-104.522	20072192030	1.0	188.7602	192.5099	191.1517
50.3412	72.9254	20072200811	1.0	215.9904	218.2182	218.1776
18.3375	159.1202	20072201517	0.0	189.1484	190.7565	192.5685
18.0479	159.0542	20072201517	1.0	188.2694	191.5688	191.8341
58.3183	107.515	20072210539	1.0	221.3034	223.2551	229.9165
58.7104	107.2753	20072210539	0.0	226.2132	227.9699	229.9165
46.9113	38.7667	20072211032	1.0	213.1717	215.2422	224.0556
47.3676	38.5918	20072211032	0.0	220.6712	222.2938	223.2861
36.311	-69.6229	20072220645	0.0	197.4637	200.9667	198.4806
36.2631	-69.6368	20072220645	1.0	195.2848	197.3238	198.4806
36.2439	-69.6424	20072220645	0.0	197.4833	200.263	199.8946
36.0905	-69.687	20072220645	0.0	191.7171	195.7299	199.8946
56.1103	-124.5248	20072222112	1.0	210.6051	214.4714	215.6572
54.658	77.0903	20072240747	1.0	219.1467	221.4816	223.4835
55.1659	76.8295	20072240747	1.0	216.2828	219.1592	223.544
30.8092	-87.5391	20072241913	1.0	191.9426	196.2563	198.2104
60.0616	46.9993	20072342333	1.0	206.6004	209.6793	214.5593
15.3012	-5.0308	20072351353	1.0	185.316	188.6883	192.9211
5.5184	14.0926	20072381242	0.0	197.5226	197.3872	202.3816
-12.3973	161.7252	20072421448	1.0	191.3081	192.903	196.8725
14.4371	33.0758	20072432339	1.0	192.9635	195.7981	196.3466
13.8671	32.9496	20072432339	0.0	190.5704	192.7309	196.4013
13.6352	32.8984	20072432339	1.0	181.8983	185.4841	195.9247
30.4976	-81.2899	20072441849	1.0	191.2395	195.7025	201.471
7.4661	150.5292	20072481544	1.0	188.0961	190.6527	191.3277
21.3601	79.4618	20072482038	0.0	189.3651	193.4564	188.0728
20.9356	79.3625	20072482038	1.0	184.5325	189.0854	187.4478
9.3377	27.1892	20072551149	1.0	191.7849	195.2045	195.9476
-33.7619	164.288	20072551423	1.0	210.5311	212.7458	218.4335
5.7538	140.9024	20072581622	1.0	183.7875	192.0446	190.4333
12.7084	-158.8728	20072641225	1.0	193.7448	197.8016	197.1676
12.0706	-159.0126	20072641225	0.0	197.6403	199.0362	197.1598
39.0529	-39.4313	20072650447	1.0	203.9245	206.2192	208.2174
22.1706	121.3942	20072671750	1.0	187.5463	191.7505	192.3087
21.698	121.2827	20072671750	0.0	194.0233	195.2464	193.2228
21.669	121.2758	20072671750	0.0	194.2575	197.7518	193.2228
21.2156	121.1694	20072671750	0.0	192.8098	195.9203	193.6525
23.414	-91.8474	20072681935	1.0	188.6626	192.6365	195.0842
15.6804	-96.3964	20072720817	1.0	190.4772	191.8163	193.2088
11.2106	152.9214	20072731538	1.0	181.7805	184.1842	189.5258
17.4392	-61.993	20072780601	1.0	184.4231	188.2051	196.2441
16.5151	-83.8279	20072800728	1.0	186.6289	192.1094	192.2404
16.4475	-83.8431	20072800728	0.0	191.2167	193.7877	192.2404
15.172	-104.1823	20072910848	1.0	181.2455	183.9669	190.669
-30.0141	-60.2325	20073020524	1.0	186.4738	189.0291	200.1194
35.6176	-162.4766	20073061256	0.0	202.245	204.5091	208.0957
34.9558	-162.6658	20073061256	1.0	204.8669	207.0567	208.4082
-34.2744	131.7384	20073061633	1.0	228.5549	228.6063	235.3341
-6.1478	28.9878	20073101150	1.0	188.0961	191.9959	194.8488
-13.0109	15.0186	20073161249	1.0	179.5573	184.3516	192.6136
7.2676	127.3472	20073211717	1.0	182.3366	185.9937	189.7158
48.5057	-133.4368	20073221113	0.0	223.0767	224.4752	227.9204
48.126	-133.5883	20073221113	1.0	223.9952	225.2228	229.2368
47.9646	-133.6521	20073221113	1.0	221.4965	222.991	229.2368
48.5057	-133.4368	20073221113	0.0	223.0767	224.4752	227.9204
31.6628	-26.0784	20073230347	1.0	209.4378	211.1436	223.1843
5.1017	119.1573	20073241749	1.0	182.5393	187.3662	186.2578
45.9364	-18.5429	20073250331	1.0	226.4792	227.2353	230.513
-13.5495	70.379	20073352053	1.0	185.952	185.2583	193.4927
-7.5832	105.6801	20073411836	0.0	184.3133	183.2995	189.1301
-7.6219	105.6718	20073411836	1.0	181.4247	184.1361	189.1301
-1.3106	94.4327	20073450726	1.0	179.6202	186.5543	183.924
-0.5149	23.1957	20073471210	1.0	178.7937	186.3835	189.042
-10.8362	81.8243	20073502008	1.0	185.0746	188.6883	191.0348
-34.0634	142.2595	20073550436	1.0	181.4843	187.969	202.5184
-25.9891	22.7007	20073591228	1.0	193.9806	199.0833	205.1146
-45.8767	160.4471	20070631428	1.0	204.1619	204.6485	210.9625
-46.9951	160.0256	20070631428	1.0	206.4396	208.4777	211.1578
35.4522	16.2703	20070681215	1.0	214.4357	217.2729	227.3278
36.3948	142.6931	20070700348	1.0	214.3945	216.5055	220.8377
-44.9831	-123.5	20070720924	0.0	225.6553	226.6932	230.0845
-45.0686	-123.5308	20070720924	0.0	225.9126	227.0611	230.0845
-45.154	-123.5617	20070720924	0.0	227.0186	227.5089	230.0845
-45.1825	-123.572	20070720924	0.0	226.3685	227.4045	230.0845
-45.2394	-123.5926	20070720924	1.0	225.4644	226.8777	230.0845
-46.9361	161.6091	20070721421	1.0	227.8565	229.6513	234.8835
-12.2793	11.773	20070741304	1.0	188.7602	191.767	189.4117
-16.3457	123.8124	20070741718	1.0	178.5353	183.2491	189.8346
-16.8279	123.7037	20070741718	0.0	187.9719	191.7505	192.1158
-16.934	123.6797	20070741718	0.0	188.0713	192.3506	192.1158
3.7627	29.2691	20070742348	1.0	185.952	189.7123	190.2256
-23.2809	-45.9741	20070751702	1.0	184.8587	190.4435	195.1972
-11.6978	164.6065	20070850252	0.0	181.005	182.8669	183.0443
-11.0412	164.463	20070850252	1.0	179.2095	185.928	183.1381
-10.6356	164.3747	20070850252	0.0	189.652	194.9936	183.2631
-2.539	-55.5055	20070850524	1.0	184.5325	189.4197	193.3532
-20.1875	-64.018	20070900547	1.0	180.9748	185.906	194.0169
41.5601	2.0395	20070921306	1.0	209.95	213.2918	215.9068
-45.6797	-100.5722	20070950752	1.0	224.6945	226.5489	232.2902
43.9346	-102.6678	20071110906	1.0	198.4358	202.0563	207.8874
-4.4529	117.1564	20071161752	1.0	190.6169	192.8249	191.2422
-10.0042	83.5172	20071192003	1.0	184.9398	189.4749	190.314
-9.6957	72.7683	20071202046	1.0	187.3696	188.9727	191.5223
-6.298	-161.0035	20071312431	1.0	185.7676	189.5848	191.9091
8.9544	-3.5766	20071391352	1.0	179.4312	184.9146	190.9785
26.585	90.0379	20071422000	0.0	190.1021	193.4261	192.8924
26.4791	90.0116	20071422000	1.0	185.0208	189.6395	192.8924
58.3242	36.4736	20071431023	1.0	209.875	213.1133	214.7733
58.9122	36.1122	20071431023	1.0	210.8413	213.5084	215.514
47.5815	104.9811	20071440607	1.0	225.126	226.9675	228.2325
9.4587	-68.593	20071451813	1.0	189.2689	191.3016	193.0225
-3.946	78.6151	20071472027	1.0	185.8994	189.0479	190.0686
-4.2167	78.5575	20071472027	0.0	188.0961	191.1835	190.0686
-32.4677	-28.2018	20071491557	1.0	218.0423	219.8838	222.0609
7.1559	147.4109	20071501558	1.0	188.2447	191.5854	193.5797
7.0067	12.9586	20071512456	0.0	190.8948	192.5099	195.7876
6.7167	12.8965	20071512456	1.0	190.1492	191.6185	195.8032
8.1682	51.8345	20071522220	1.0	181.1254	186.6391	194.109
15.5825	67.3617	20071532123	0.0	178.9542	178.108	190.4101
-3.7486	117.2767	20071641751	1.0	186.4219	189.0854	189.8938
-13.3384	18.1967	20080011237	1.0	186.4478	190.8254	191.5212
39.894	-125.655	20080041033	0.0	215.0767	217.0615	217.1718
38.9278	-125.9564	20080041033	0.0	213.045	215.4559	219.8759
38.6981	-126.0271	20080041033	1.0	211.4122	214.2244	219.5361
38.3056	-126.147	20080041033	1.0	207.6958	210.4549	219.5361
8.2102	-133.5554	20080041041	1.0	191.5813	196.2429	200.0166
-10.1433	168.4295	20080091422	1.0	182.9412	187.8499	187.9814
32.725	-89.5919	20080101919	1.0	208.1488	209.6263	212.3238
36.7006	-163.7245	20080121302	0.0	220.4384	222.1887	224.8946
-12.072	174.1805	20080131359	1.0	183.3104	186.1462	188.0217
41.5047	175.0773	20080150133	1.0	225.7001	227.2232	230.7656
-8.663	-39.7757	20080750417	1.0	184.4231	190.2499	192.6519
-3.516	105.7251	20080750642	1.0	187.319	190.6353	189.6412
-11.8522	-55.9113	20080810520	1.0	179.4628	186.1462	193.5138
-4.1343	131.1361	20080881656	1.0	184.5052	189.4197	188.5082
-21.6285	116.4362	20080891743	1.0	175.3734	178.7956	192.4027
31.4678	-43.0292	20081630456	1.0	207.5543	209.0895	222.1848
-34.5471	156.3181	20083590343	1.0	210.8413	213.6389	218.672
-47.7712	-152.3652	20083611119	1.0	227.3246	229.2299	234.0081
-11.8683	143.378	20083611606	1.0	178.9542	181.1424	187.4897
-12.38	143.2654	20083611606	1.0	183.7038	186.081	187.8491
-5.043	21.0778	20083641225	1.0	175.1225	181.1424	189.9697
8.9408	-83.8817	20081640724	1.0	184.1205	185.1673	192.0657
47.9337	33.7886	20081651051	1.0	210.2191	213.3248	217.6606
33.0201	73.2628	20081652112	1.0	193.3994	196.8874	196.7861
-37.2476	-52.9483	20081670450	1.0	218.0423	220.3108	224.4227
55.9904	49.3649	20081682316	1.0	211.208	213.0069	215.1698
7.5113	10.0442	20081682508	1.0	185.9257	190.9455	193.6946
7.3953	10.0192	20081682508	0.0	193.8092	197.1323	193.6946
-15.278	-167.9189	20081691247	0.0	193.8092	196.2696	195.6355
-15.4227	-167.9513	20081691247	0.0	193.895	197.9751	195.6355
-15.4902	-167.9664	20081691247	1.0	190.6633	192.778	195.6355
8.4629	-74.7331	20081700647	1.0	186.5514	190.496	191.3635
64.8905	25.3877	20081741050	1.0	225.4306	227.7243	231.0853
6.6681	-167.8379	20081741259	0.0	194.0873	197.3619	197.2381
-7.8675	-74.1215	20081741845	1.0	188.1952	193.7129	196.753
65.4978	-148.2229	20081742223	0.0	213.1013	215.6377	215.6967
25.2679	144.132	20081760352	1.0	197.6011	201.6707	201.1325
48.5419	87.5914	20081760716	1.0	212.1061	214.591	216.2116
49.2627	87.2973	20081760716	1.0	210.4125	214.0648	214.7468
8.2296	24.4037	20081761201	0.0	188.5647	193.5926	193.8415
56.2757	122.5917	20081770443	0.0	210.1893	213.6128	213.4754
57.3998	121.9572	20081770443	0.0	212.6203	215.1378	213.1707
56.8862	136.1534	20081780348	1.0	212.6772	216.075	217.5279
59.7521	134.4077	20081780349	0.0	218.2854	219.9666	232.8873
28.912	79.8563	20081782042	0.0	189.9133	193.1507	193.9512
39.0604	-89.8594	20081791916	1.0	193.8307	197.3492	205.6028
39.6153	-90.0325	20081791916	0.0	204.0942	206.4786	205.7434
10.1602	81.6087	20082462024	0.0	192.3006	194.6087	195.0536
20.969	94.1143	20082470716	1.0	191.1479	194.866	194.1542
32.9545	150.4101	20082471604	1.0	197.9136	199.8575	204.7224
16.5899	76.5844	20082510828	1.0	187.697	194.7377	195.1012
16.5899	76.5844	20082510829	1.0	187.697	194.7377	195.1012
-3.4828	148.2189	20082511549	1.0	185.7676	189.875	191.1771
16.4086	-52.9644	20082550526	0.0	195.3055	196.8485	197.5409
15.3962	84.3197	20082552016	0.0	189.8896	193.0582	191.8179
24.6099	149.8139	20082561601	0.0	199.3112	198.2817	199.7893
23.0003	149.425	20082561601	1.0	192.9854	195.4134	199.6956
-23.8562	-177.1636	20082580147	1.0	198.7041	202.3133	204.3833
-22.432	-177.5054	20082580147	1.0	197.4833	200.8363	203.0786
-2.1858	136.1464	20082591639	1.0	186.292	190.496	196.955
-2.2825	136.1258	20082591639	0.0	193.1166	194.9228	196.6894
7.2048	-84.3356	20082600726	1.0	184.6143	188.8025	189.9375
7.0984	-84.3585	20082600726	1.0	187.5966	192.903	189.9375
-31.5575	-175.0165	20082631304	1.0	217.4232	218.8436	223.2526
8.4374	-62.1962	20082641748	1.0	188.5647	184.8451	200.3097
2.8247	171.2197	20082651422	1.0	187.697	189.4012	191.8404
19.8842	114.7211	20082661818	1.0	184.1757	189.0291	194.0683
19.228	114.5692	20082661818	0.0	189.5088	188.361	190.3261
19.0832	114.5358	20082661818	0.0	192.3896	195.1765	190.3261
19.0543	114.5292	20082661818	0.0	192.3006	191.4523	190.3261
19.035	114.5247	20082661818	0.0	192.1443	194.4643	190.3261
18.9964	114.5158	20082661818	0.0	191.9426	194.1581	190.3261
20.5389	124.1624	20082721741	0.0	191.7623	193.1507	194.7046
-39.4539	162.3788	20083380324	1.0	207.8212	210.7108	214.3232
7.6679	116.6374	20083411804	0.0	182.9983	186.2328	186.6126
-8.9374	-59.9649	20083420541	1.0	187.7221	190.8254	192.6312
-37.8292	75.3591	20083460910	0.0	222.0122	223.2043	227.2972
-7.5059	-64.2856	20083470559	0.0	180.057	183.9426	190.4188
-13.5017	47.1954	20083472229	0.0	191.6945	194.114	191.9575
-14.1578	47.0497	20083472229	0.0	188.3434	189.1601	191.7778
-17.6203	26.8981	20083501210	1.0	184.1757	188.6309	190.9377
-34.726	147.0836	20083530420	1.0	210.9001	213.0801	219.9328
