# Supplementary material for: Near-global distributions of overshooting tops derived from Terra and Aqua MODIS observations
Source: Copernicus journal article supplement (doi:10.5194/amt-16-1391-2023), 2023-03-16
Supplement: Supplementary file 1 [file amt-16-1391-2023-supplement.zip › File S3.txt]

lat	lon	time(yearday.hhmm)	probability	OTflag(1-OT	0-NOT)	Tb11	Tb6.7	tropopause temperature
-58.184708	156.94202	2018008.2335	0.34522122	0.0	227.94705	230.00806	229.91711
-57.923424	157.56029	2018008.2335	0.36302438	0.0	228.26656	229.13715	230.37415
-57.69922	158.1284	2018008.2335	0.4340765	0.0	229.21512	230.70439	230.57336
-56.468082	104.7571	2018011.0240	0.72538805	0.0	228.37729	231.33984	230.31451
-57.064087	104.48499	2018011.0240	0.58776665	0.0	227.11969	229.90096	228.01373
-44.66061	72.28643	2018013.0540	0.7496802	0.0	221.24419	222.77179	224.46062
-22.227764	-172.6906	2018013.2205	0.9821108	1.0	194.45358	199.33926	199.13533
-23.15015	-172.10995	2018013.2205	0.9771319	1.0	195.4771	196.65822	199.04158
-22.522917	-171.91846	2018013.2205	0.9999201	1.0	183.4491	190.16856	199.2994
-43.593258	-152.17363	2018014.1935	0.43805766	0.0	229.1059	230.88774	230.96994
-12.765349	178.36789	2018014.2245	0.9795419	1.0	193.79381	206.74515	194.2273
-22.152023	-178.87593	2018015.2150	0.99076194	1.0	189.28113	191.17131	196.04727
-12.788767	138.64804	2018016.0105	0.99537224	1.0	190.26222	194.77676	191.06735
-11.477456	139.12245	2018016.0105	0.9966126	1.0	186.57945	191.06982	188.87985
36.486214	74.67176	2018017.0635	0.82008934	0.0	216.17632	219.2428	221.98492
36.14255	74.605354	2018017.0635	0.6344973	0.0	220.45766	221.5291	225.80524
37.781544	76.15825	2018017.0635	0.42840913	0.0	215.76347	217.7154	217.41931
36.519802	75.58549	2018017.0635	0.5556883	0.0	217.77998	220.10252	223.44977
37.07872	76.20381	2018017.0635	0.6840444	0.0	216.4498	219.18456	222.35992
36.51931	76.861176	2018017.0635	0.8138649	0.0	216.87431	219.49037	225.44
36.02446	76.878044	2018017.0635	0.7864068	0.0	215.76347	218.83246	222.65094
-5.990726	111.07072	2018018.0230	0.85680723	1	192.269	196.85336	192.73666
-4.5647883	112.680176	2018018.0230	0.9487245	1.0	191.39616	193.59143	192.97885
-5.2311974	112.56291	2018018.0230	0.85560066	1	191.21927	190.81386	193.18979
-5.5263534	88.72503	2018018.0410	0.9592918	1.0	189.65196	194.61958	193.76758
-4.6920447	90.07462	2018018.0410	0.66606075	1	191.74759	192.28848	194.1582
25.770176	-39.77161	2018018.1355	0.8171832	1	207.45839	210.53586	214.72307
26.22805	-39.598434	2018018.1355	0.8755814	1.0	207.31564	210.28624	215.73528
47.53374	-42.172	2018021.1420	0.7497577	0.0	220.09213	223.4654	222.0889
47.710247	-41.830086	2018021.1420	0.79228365	0.0	219.15945	220.68169	222.0889
49.927067	-40.06761	2018021.1420	0.19011144	0.0	220.83656	222.21915	222.10648
49.49457	-39.854443	2018021.1420	0.228464	0.0	219.74019	220.94702	220.11429
57.520294	-125.56239	2018021.2050	0.43453455	0.0	218.73619	220.74702	220.48935
53.170254	-132.49635	2018021.2055	0.48559257	0.0	222.8307	224.57756	223.85458
52.087994	-129.82176	2018021.2055	0.36591932	0.0	224.68427	226.77515	224.83505
54.483597	-18.490658	2018023.1225	0.4730753	0.0	225.05092	226.15506	227.17793
57.504322	-12.283209	2018023.1225	0.38850844	0.0	221.18167	223.32797	222.67403
53.229755	-134.17226	2018023.2040	0.44888902	0.0	217.37933	220.48488	218.33765
57.44386	-27.722355	2018024.1310	0.96118397	1	208.96169	210.41869	212.32733
57.18429	-27.74199	2018024.1310	0.42081422	0.0	211.27522	213.25302	212.19061
50.815243	-130.98665	2018024.1945	0.37561685	1	225.74857	226.99126	228.33588
51.01643	-130.63187	2018024.1945	0.55148745	0.0	225.05092	227.41493	230.13666
52.95832	-127.285126	2018024.1945	0.30970007	0.0	219.91644	222.1284	220.46674
52.572685	-126.64854	2018024.1945	0.23219487	0.0	221.43134	223.12065	221.62494
54.66217	-119.8617	2018025.1850	0.5363267	0.0	216.00468	219.80847	218.28058
53.689877	-119.27257	2018025.1850	0.23135233	0.0	218.78519	220.0974	219.8963
54.393505	-118.712074	2018025.1850	0.5050609	0.0	216.24484	219.0144	219.05353
54.080616	-118.63861	2018025.1850	0.4161238	0.0	216.14206	218.61151	218.43536
53.12978	-118.63092	2018025.1850	0.23180762	0.0	219.17566	220.80714	220.28595
53.858078	-117.858284	2018025.1850	0.36801076	0.0	216.8405	218.86467	218.42853
53.172394	-117.95903	2018025.1850	0.15617302	0.0	219.69205	219.10492	220.00275
53.453175	-117.31885	2018025.1850	0.18958662	0.0	217.52994	218.2302	218.76447
53.66785	-117.12684	2018025.1850	0.6043106	0.0	217.22835	219.27979	219.57599
46.05047	160.03734	2018025.2350	0.40764415	0.0	228.22499	230.88058	230.50235
46.57639	160.25519	2018025.2350	0.116774455	0.0	229.90695	232.20459	230.11954
50.223312	164.33917	2018025.2350	0.3905776	0.0	216.03908	219.94296	217.21915
57.410023	-12.653276	2018026.1120	0.12263512	0.0	212.72374	212.98164	214.10187
58.386524	-155.36703	2018043.2155	0.34672013	0.0	228.40494	228.35808	229.84076
58.854977	-154.61755	2018043.2155	0.7548495	0.0	225.32806	226.0379	232.32513
57.584106	179.5987	2018043.2335	0.26231423	0.0	219.78831	222.44238	220.45288
57.806168	-179.44885	2018043.2335	0.25403377	0.0	220.13994	221.51932	222.0896
58.048306	-179.03583	2018043.2335	0.09580108	0.0	222.21982	223.236	222.79858
38.943844	163.19756	2018050.0040	0.568754	0.0	224.65485	226.02531	227.89932
39.61974	164.76567	2018050.0040	0.549199	0.0	225.9793	228.31529	227.49503
39.23551	164.97588	2018050.0040	0.29135802	0.0	226.3237	227.46698	226.5126
38.03456	103.03232	2018051.0440	0.4504743	0.0	216.24484	218.93428	216.41052
36.3808	160.86047	2018054.2320	0.5414081	0.0	212.24548	214.66997	216.19
36.97459	161.26125	2018054.2320	0.6505084	0.0	212.57706	213.80693	216.88141
5.4803386	148.13625	2018057.0055	0.96834904	1.0	185.77046	192.57452	187.56659
-7.730833	137.3239	2018058.0145	0.9584386	1	185.46248	193.31888	185.5762
2.7385342	109.894646	2018058.0320	0.5500244	0.0	189.74411	189.61188	192.85248
-9.310001	-164.87056	2018058.2130	0.9999019	1.0	189.46698	196.90512	193.85468
-9.808766	-157.80109	2018059.2035	0.97989607	1.0	190.38313	192.19226	196.62294
-25.325745	-150.60878	2018059.2040	0.8479408	1.0	203.37874	205.50014	204.93935
-51.16415	151.96854	2018069.2305	0.15932348	0.0	225.6618	227.13313	226.29057
-59.61246	168.10664	2018069.2305	0.57417005	0.0	216.34741	216.60394	216.4146
-58.62852	169.02286	2018069.2305	0.6701921	0.0	212.30089	215.43346	214.36308
-59.803307	170.67224	2018069.2305	0.23200879	0.0	215.9875	218.7303	216.51225
-56.719635	-44.854866	2018090.1330	0.52246666	0.0	219.27286	221.89304	220.3964
-47.506546	-70.925644	2018094.1440	0.7958832	0.0	229.75838	232.65894	236.66782
-48.58642	-70.107834	2018094.1440	0.7363938	0.0	224.06305	225.10112	231.98813
-44.337234	10.861807	2018095.0850	0.17201622	0.0	222.00447	222.55577	222.02481
-30.172386	-46.534634	2018095.1340	0.66733074	1.0	221.72638	221.79645	226.90045
-9.586678	-68.68997	2018097.1500	0.99875593	1.0	193.655	200.01343	195.22308
-9.771147	-68.297	2018097.1500	0.84689903	1.0	192.29776	196.00851	194.32465
-39.43869	-83.11831	2018097.1510	0.08185449	0.0	223.98868	224.70932	224.4223
-39.395573	-82.073235	2018097.1510	0.17922951	0.0	221.86557	222.46133	223.82465
-30.067995	-92.65301	2018098.1550	0.9522089	1.0	227.00662	230.40004	237.8703
-30.978678	-92.286095	2018098.1550	0.97432977	1	225.124	225.8022	233.01483
-36.245407	-110.5628	2018099.1635	0.8414187	0.0	206.9467	207.93857	207.70508
-35.95225	-110.36436	2018099.1635	0.8561139	0.0	206.80244	211.7072	207.70508
-40.264748	176.33833	2018099.2135	0.35683522	0.0	215.0331	217.40077	217.68825
-39.90168	177.18958	2018099.2135	0.14080113	0.0	216.00468	217.41771	216.27054
-7.466515	93.58944	2018102.0345	0.96829456	1.0	190.95247	200.60258	192.04858
-7.735911	94.1535	2018102.0345	0.34416947	0.0	193.17952	196.2361	193.64233
-6.9472985	94.760994	2018102.0345	0.9753381	1.0	185.53116	189.42903	193.34546
33.269547	64.37219	2018102.0655	0.69618785	0.0	213.2157	215.94464	214.97551
55.10056	126.0578	2018109.0200	0.29628804	0.0	221.3846	222.98624	223.38512
51.061222	9.124801	2018130.1030	0.9058185	1.0	220.96233	223.06972	227.53595
49.639236	9.303064	2018130.1030	0.95686436	1.0	225.4879	227.0197	230.73517
48.918995	10.5394335	2018130.1030	0.73517853	1	219.78831	221.30359	226.77032
36.36348	53.904743	2018131.0800	0.8691326	1	218.2107	219.96361	222.88815
39.093914	27.123085	2018131.0940	0.6628999	0.0	218.0289	218.99838	219.88474
37.53945	37.31081	2018132.0845	0.9885261	1.0	214.73457	217.01382	217.706
37.66249	39.665573	2018132.0845	0.945942	1	212.11594	214.78838	215.08563
34.34127	40.78794	2018132.0845	0.6006281	0.0	218.91566	220.79214	222.35223
42.250942	-84.42471	2018132.1655	0.97515273	0.0	211.94893	212.9417	216.55518
42.35637	-82.847855	2018132.1655	0.39196026	0.0	211.72534	213.88423	214.59863
42.804764	-82.621376	2018132.1655	0.4637104	0.0	211.06755	214.26097	211.49414
41.9495	-82.386375	2018132.1655	0.47227132	0.0	209.70605	213.43022	211.08398
42.011063	-81.63111	2018132.1655	0.78938	0.0	206.57486	210.1605	210.83398
40.794327	42.96486	2018133.0750	0.7842481	1	213.59511	216.6214	214.3039
39.569954	43.792717	2018133.0750	0.987344	1	215.12056	217.91583	216.315
39.17571	45.14648	2018133.0750	0.88730496	1	212.19	213.87778	219.27362
39.44548	45.669327	2018133.0750	0.9645345	1	212.63208	215.06671	217.4914
38.754482	45.669273	2018133.0750	0.9854295	1.0	210.43938	213.05472	218.61835
38.124283	46.14425	2018133.0750	0.62536275	0.0	218.44122	220.2816	219.44159
38.396652	47.81799	2018133.0750	0.98231035	1.0	216.07341	220.2612	218.05292
35.96522	47.489952	2018133.0750	0.97098845	1.0	214.85771	216.1228	220.4455
43.397827	2.8941698	2018134.1010	0.21766575	0.0	223.48022	224.98412	223.48265
43.273663	4.1268597	2018134.1010	0.39029697	0.0	224.24121	225.40665	227.48265
27.697432	-79.91085	2018134.1650	0.99840814	1.0	201.17209	205.77545	213.80054
5.083591	-12.602838	2018138.1135	0.90204215	1	189.12558	195.08778	193.02216
5.361535	-12.348717	2018138.1135	0.24269034	0.0	191.60156	189.70271	193.31122
4.602216	-12.207206	2018138.1135	0.53310525	0.0	192.58432	198.00183	192.95184
2.9671376	6.648471	2018140.0945	0.9955942	1.0	191.18971	194.9611	194.41394
3.2274456	7.082504	2018140.0945	0.9979803	1.0	189.83604	197.23856	194.41394
0.12826891	6.529669	2018140.0945	0.5701772	1	190.35295	191.83568	193.37488
10.227196	-114.43846	2018140.1755	0.95110863	1.0	196.45009	205.16743	197.25427
11.5401745	-80.9893	2018141.1520	0.98454463	1.0	189.80544	197.05962	195.30817
7.303229	-79.77368	2018141.1520	0.9969869	1.0	191.66003	195.51862	193.06598
-37.15865	-34.8286	2018144.1245	0.80731636	1	218.93195	221.45085	223.14568
-37.4545	-33.379715	2018144.1245	0.5565995	0.0	218.62167	220.79713	222.32146
-43.065655	-29.388401	2018144.1250	0.71351284	0.0	212.76033	215.75333	213.34099
-40.41158	-23.206947	2018145.1155	0.34183365	0.0	218.57251	220.61624	219.8901
-37.236866	-70.0548	2018148.1400	0.88907313	0.0	208.0854	209.66647	210.73422
-37.293297	-68.18241	2018148.1400	0.7259545	0.0	207.53973	208.81335	211.98618
-52.544437	-107.81207	2018153.1605	0.19707267	0.0	217.69678	219.74619	218.3406
-39.962456	103.91591	2018175.0350	0.10175333	0.0	214.2569	214.71367	214.52615
-41.238216	51.774406	2018177.0655	0.28079605	0.0	226.58072	227.82889	228.51483
-40.836056	51.94657	2018177.0655	0.36590374	0.0	225.84961	227.121	228.51483
-40.567417	52.486584	2018177.0655	0.23306288	0.0	225.34262	226.4791	227.4328
-44.59185	125.37182	2018178.0105	0.22823188	0.0	207.43802	207.4565	207.62317
-33.67026	87.38714	2018178.0420	0.29080847	0.0	217.3961	221.01671	218.778
-31.996904	88.49276	2018178.0420	0.14113124	0.0	221.33784	221.41167	223.73991
-31.780924	88.601036	2018178.0420	0.27438092	0.0	220.82085	222.27629	223.73991
-31.71758	89.10087	2018178.0420	0.69241935	1.0	218.07855	218.3779	224.67351
-32.151783	89.105415	2018178.0420	0.1700053	0.0	221.52469	222.65457	223.4157
-31.926676	89.71767	2018178.0420	0.39665052	0.0	219.04579	220.78212	223.2487
-32.337067	89.83649	2018178.0420	0.21958442	0.0	220.28314	221.01173	222.01335
-42.1086	33.56866	2018178.0740	0.92764544	1.0	206.82307	209.71933	211.09894
-33.6309	72.61014	2018179.0505	0.9691134	1	226.35233	229.94902	237.5828
-33.016872	73.766235	2018179.0505	0.69327646	0.0	227.31705	229.0004	227.5281
-32.544785	74.03123	2018179.0505	0.6299585	1	225.64734	227.34271	228.12772
-31.805489	-128.66028	2018180.1855	0.20157982	0.0	214.16794	217.09966	214.32338
13.619272	-99.42873	2018181.1750	0.8844711	1	194.37169	193.7563	200.51947
13.248983	-98.93553	2018181.1750	0.7449528	0.0	194.58972	194.19958	200.75385
46.20326	-49.413277	2018182.1505	0.21606734	0.0	214.78737	215.34831	214.91245
25.283041	-61.908154	2018182.1510	0.9506151	1.0	202.45912	205.26685	204.80893
12.05351	-68.038086	2018182.1515	0.97572064	1.0	192.84048	193.22725	197.58237
11.528426	-67.8115	2018182.1515	0.8307198	1.0	194.99544	195.87352	197.21518
28.685427	-52.689373	2018183.1415	0.1701483	0.0	217.31229	216.65625	217.9338
54.737965	-111.688774	2018184.1945	0.80797964	0.0	217.82988	219.47987	218.18314
29.867273	-82.27196	2018185.1540	0.78831756	0.0	213.0704	214.94337	215.36092
43.59641	-95.238495	2018185.1715	0.21767637	0.0	206.74048	207.34071	207.34174
42.924343	-95.248436	2018185.1715	0.9943363	1.0	192.35526	194.18495	206.84955
43.956272	-94.38248	2018185.1715	0.98967946	1.0	199.50925	212.80139	207.47845
43.44814	-94.448364	2018185.1715	0.9858078	1.0	196.65755	197.51685	207.01752
44.962067	-91.698296	2018185.1715	0.42473665	0.0	206.09549	207.68643	207.22845
46.019722	-90.83062	2018185.1715	0.6840806	1.0	205.33525	207.41522	207.36517
46.603912	-90.51593	2018185.1715	0.1463174	0.0	206.74048	208.21222	207.36908
46.279	-90.65031	2018185.1715	0.7380438	1.0	205.99063	208.87582	207.36908
45.49803	-90.774284	2018185.1715	0.9936325	1.0	201.1021	204.12212	207.22845
52.137333	-106.70262	2018185.1850	0.47409576	0.0	225.38625	227.14526	226.06148
54.944153	-101.98631	2018185.1850	0.549568	0.0	223.26956	228.39691	226.55171
55.2144	-101.12695	2018185.1850	0.5818665	0.0	223.11862	228.33862	226.47554
55.393562	-100.881615	2018185.1850	0.2527807	0.0	221.60234	223.8197	223.20406
54.512753	-101.57712	2018185.1850	0.66068125	0.0	224.07794	225.7853	231.61226
54.801342	-101.109184	2018185.1850	0.29885173	0.0	223.57028	224.65666	226.47554
40.400875	-88.054085	2018186.1620	0.91968906	1.0	203.08917	205.85481	204.1403
40.349316	-87.01175	2018186.1620	0.9982703	1.0	191.6308	200.53665	203.56218
41.05618	-86.33321	2018186.1620	0.42014456	0.0	201.03198	204.16934	203.83171
44.761086	-83.067924	2018186.1620	0.98541117	1.0	200.9149	205.55368	207.06609
59.2064	-120.120544	2018187.2015	0.698802	0.0	218.04547	221.20993	222.02794
42.579426	116.541885	2018188.0255	0.5236825	0.0	224.31532	225.47932	227.9831
44.091114	117.46586	2018188.0255	0.8396053	1	216.05623	217.62589	223.35028
45.075695	120.734474	2018188.0255	0.253329	0.0	216.21057	217.39513	217.43597
44.130474	120.87191	2018188.0255	0.63737005	0.0	213.6491	215.26906	214.99286
44.389126	121.00163	2018188.0255	0.64804536	0.0	212.13446	213.27277	216.0456
56.3395	132.81995	2018188.0255	0.62025285	0.0	222.61765	225.37666	223.4206
47.64171	106.76239	2018189.0340	0.79503083	0.0	226.3809	228.78264	233.09607
47.49313	107.37276	2018189.0340	0.73838854	0.0	228.19725	229.48018	232.9242
58.735252	-156.73895	2018204.2240	0.1240433	0.0	224.86057	225.88237	225.13495
54.068428	159.85248	2018207.0145	0.58127356	0.0	224.06305	224.88408	225.84656
54.998142	125.91072	2018209.0310	0.7140024	0.0	216.55197	218.1258	220.65344
55.2455	126.11504	2018209.0310	0.16678	0.0	216.62001	218.04309	216.9469
55.08308	129.69707	2018209.0310	0.63352996	0.0	212.44836	213.99971	214.3805
55.916092	137.59521	2018210.0215	0.40949178	0.0	224.93385	226.77925	227.14624
50.833908	157.95029	2018212.0025	0.28482592	0.0	221.98906	225.48361	223.13005
49.65771	149.07497	2018213.0110	0.9826173	1	225.09477	227.00343	237.17065
26.133121	177.40001	2018216.2315	0.9089725	1	196.9925	201.61205	200.60751
12.178769	168.00586	2018218.0000	0.24335916	0.0	189.80544	187.9233	190.28009
11.871461	168.4195	2018218.0000	0.58815986	0.0	189.71341	194.27258	190.28009
18.11749	142.77509	2018218.0135	0.74111277	1	193.51575	194.28714	195.246
30.127972	144.47653	2018219.0040	0.5494994	0.0	205.4416	208.43536	208.91336
12.860418	138.90286	2018220.0125	0.28145126	0.0	195.21019	198.7043	195.878
18.682726	111.43613	2018220.0305	0.9392629	1.0	187.95435	189.99063	191.29005
17.593222	113.554016	2018220.0305	0.99836427	1.0	188.08269	190.00851	191.83693
14.173057	112.81016	2018220.0305	0.2314067	0.0	190.65385	192.24043	191.1338
12.343993	133.02335	2018222.0115	0.97650504	1.0	188.84395	192.11176	196.12555
-48.96655	68.36776	2018230.0540	0.46663138	0.0	208.70442	211.64426	212.84549
-49.497883	68.90035	2018230.0540	0.5613646	0.0	208.76392	211.38394	212.28494
-50.22035	70.94801	2018230.0540	0.2111845	0.0	207.96468	211.41928	208.01932
-51.282406	75.29883	2018230.0540	0.16289406	0.0	209.07996	211.14243	209.949
-49.382793	-70.1854	2018255.1525	0.5460627	0.0	204.01826	207.10757	204.7223
-46.726532	-69.57116	2018255.1525	0.49039406	0.0	203.99635	208.94588	204.44106
-50.267128	-126.79918	2018257.1830	0.89238685	0.0	212.24548	214.79459	213.45842
-45.030983	-120.737076	2018257.1830	0.43420196	0.0	216.48389	217.581	217.21526
-46.94126	-111.59323	2018261.1625	0.436752	0.0	215.57314	217.8603	216.31409
-10.758711	153.09941	2018262.0030	0.9677856	1.0	191.98018	199.30447	193.81697
-49.514065	126.84623	2018262.0040	0.82112426	0.0	208.64487	211.57417	209.88533
-49.217083	127.32412	2018262.0040	0.6922478	0.0	209.90009	210.75412	211.01033
-36.76327	91.88818	2018262.0355	0.67102873	0.0	219.11078	220.95699	219.85382
-36.99308	91.882195	2018262.0355	0.84869546	1	219.02957	219.75656	219.85382
-36.466724	92.18658	2018262.0355	0.39295647	0.0	217.82988	220.05116	219.1087
-36.977623	92.74157	2018262.0355	0.3660703	0.0	218.22722	219.84991	218.79132
4.999092	168.18077	2018262.2330	0.9776564	1.0	187.46904	191.3394	192.89857
4.811603	168.47592	2018262.2330	0.3704563	0.0	193.40396	194.22879	193.92982
4.585297	168.9332	2018262.2330	0.9633719	1	188.68661	197.0211	193.82826
4.8985615	169.50313	2018262.2330	0.9821018	1.0	190.23193	192.82556	193.71107
6.0022516	169.87599	2018262.2330	0.98106754	1.0	190.14093	194.44676	192.04701
12.271709	146.99168	2018263.0105	0.68601257	0.0	191.39616	195.61473	194.37334
-1.4882282	141.65901	2018263.0110	0.961505	1.0	190.14093	194.79102	191.81865
11.925357	146.91397	2018263.0110	0.982103	1	187.85777	199.32768	193.92021
10.937723	147.29498	2018263.0110	0.83867455	0.0	194.09753	200.76665	195.56865
10.727593	148.05792	2018263.0110	0.99926573	0.0	183.63026	194.258	195.77177
10.201803	148.05647	2018263.0110	0.9999471	1.0	183.26701	193.59143	196.2249
11.29771	148.42487	2018263.0110	0.9981274	1.0	182.15445	187.96283	191.74834
-4.5013022	93.77235	2018263.0430	0.8748567	0.0	194.4263	205.58041	194.50623
-5.2054048	94.56056	2018263.0430	0.5147302	0.0	191.98018	195.99504	193.06873
-5.371877	95.40462	2018263.0430	0.99860746	1.0	191.10092	200.13695	195.13904
6.6247845	178.44794	2018263.2235	0.94791555	1.0	184.27501	185.92615	193.26651
8.016478	156.01913	2018264.0015	0.9917365	1.0	192.29776	194.76253	193.61874
13.500823	132.61969	2018264.0150	0.9769768	1.0	188.33815	194.2142	191.66763
7.4303026	131.90872	2018264.0150	0.6567599	0.0	192.3265	195.79214	193.4567
6.2310104	131.36568	2018264.0155	0.9977507	1.0	188.84395	197.34015	193.83951
27.524103	116.71296	2018264.0325	0.9979613	1.0	193.26382	202.92014	194.95804
2.9799283	105.80945	2018264.0330	0.99284184	1.0	191.95117	195.25557	195.67679
3.70973	107.22903	2018264.0330	0.96377957	1.0	197.42654	200.4705	198.08304
5.011426	107.76101	2018264.0330	0.8031594	1	193.40396	197.44131	195.41898
-1.3440468	104.71562	2018264.0335	0.99327105	1.0	190.04971	194.53336	195.14554
-43.428173	80.21769	2018264.0345	0.41914538	0.0	211.01079	213.17387	211.16507
-39.30596	85.398735	2018264.0345	0.23034884	0.0	210.26668	211.71419	210.84476
5.6579385	61.529583	2018264.0650	0.998486	1.0	193.40396	194.41783	196.04623
15.767044	165.82956	2018264.2315	0.9883025	1.0	190.53377	189.42903	198.87544
12.603633	1.0180722	2018265.1050	0.87332034	1.0	193.655	197.79172	195.08098
12.848103	1.2988884	2018265.1050	0.9498849	1.0	193.29189	192.7161	194.71379
12.978798	1.6886787	2018265.1050	0.97591305	1.0	189.52873	186.67787	195.19035
56.884495	30.581448	2018267.1025	0.2037033	0.0	221.35344	221.97011	221.798
27.512148	-44.923813	2018267.1350	0.9299944	1.0	203.28984	208.91476	211.22372
27.681578	-44.71211	2018267.1350	0.8193124	1.0	204.6922	207.86563	211.22372
32.914837	-42.612553	2018267.1350	0.46753728	0.0	210.24744	211.9574	212.61826
31.274443	-43.0513	2018267.1350	0.9322161	1.0	208.26595	208.49084	211.32333
27.721254	-43.81557	2018267.1350	0.98036826	1.0	203.88667	210.57967	210.2374
32.05964	-42.000626	2018267.1350	0.9627124	1.0	208.28595	209.83972	209.90927
29.620468	-42.443756	2018267.1350	0.96966213	1.0	208.24591	212.60641	210.41513
30.210869	-42.170383	2018267.1350	0.8514795	0.0	208.1055	213.49556	210.0499
29.844763	-42.075237	2018267.1350	0.9536521	1.0	207.02895	210.6743	210.0499
33.547085	-40.88927	2018267.1350	0.99635017	1.0	201.65906	203.75056	208.03427
35.498455	17.188356	2018268.0935	0.5424702	1	207.74255	211.63725	210.91446
31.404001	-95.79795	2018269.1655	0.99078923	1.0	197.0438	199.67313	200.46423
58.425842	-167.7337	2018289.2255	0.8578261	0.0	218.98079	222.2525	221.59752
54.678535	-30.09957	2018290.1350	0.16725579	0.0	214.6288	216.59814	214.85835
53.184513	-30.788689	2018290.1350	0.28972095	0.0	214.29242	215.69928	214.57124
52.674175	-31.037327	2018290.1350	0.6821534	0.0	213.16127	215.84319	214.71382
55.855476	-48.4592	2018294.1325	0.47530353	0.0	214.6288	217.15671	215.58568
56.658268	-153.54845	2018295.2040	0.32541192	0.0	216.50092	216.6272	217.50757
39.954536	-137.02489	2018295.2045	0.52763873	0.0	208.60512	212.04715	209.47925
46.837826	-150.47899	2018297.2030	0.7162866	0.0	228.68079	229.32985	232.51459
30.216623	-57.296906	2018298.1445	0.20508155	0.0	208.9222	209.63622	209.42169
28.357265	-56.905396	2018298.1445	0.41842884	0.0	205.54767	207.33244	206.16388
28.444588	-55.515213	2018298.1445	0.99953747	1.0	195.66292	200.17052	201.26154
28.175756	-55.06054	2018298.1445	0.9653507	1.0	195.74232	201.31592	201.1756
28.622574	-54.78201	2018298.1445	0.93658775	1	199.02238	201.35844	201.3006
13.545801	-112.91928	2018304.1730	0.9341249	0.0	194.39902	197.65471	196.98389
11.682789	-113.154434	2018304.1730	0.94313896	0.0	196.37204	193.77121	196.64014
7.638896	-159.70995	2018304.2050	0.85197973	0.0	188.68661	193.97908	192.15047
7.3432517	-159.68904	2018304.2050	0.83308756	0.0	189.28113	196.28932	192.15047
7.2369075	-159.26286	2018304.2050	0.3076745	0.0	190.92268	192.94997	191.65828
6.3209343	-159.09961	2018304.2050	0.7504835	0.0	187.82553	192.79433	191.30672
6.840933	-158.46248	2018304.2050	0.9541971	1.0	184.80367	190.6241	191.51765
4.9440517	-158.52628	2018304.2050	0.9869826	1.0	189.03192	192.28848	190.77547
7.1297464	-157.67056	2018304.2050	0.68825114	0.0	190.71376	194.70546	191.29109
7.4222507	-157.581	2018304.2050	0.73195136	0.0	191.77675	204.14102	191.88484
6.310482	-157.5103	2018304.2050	0.97744465	1.0	183.98988	189.15161	190.81453
-40.743668	28.81128	2018341.0810	0.18969613	0.0	218.80151	220.46461	219.27615
-40.99494	29.031404	2018341.0810	0.1580128	0.0	219.07832	219.73576	219.21951
-41.757442	30.204815	2018341.0810	0.6219714	0.0	216.09056	218.15883	218.76736
-37.92199	31.408712	2018341.0810	0.9989786	1.0	203.79874	210.07883	210.48514
-39.305065	31.250498	2018341.0810	0.93788683	1.0	208.00496	210.61609	210.81522
-38.33553	31.544296	2018341.0810	0.9924831	1.0	202.0723	205.7401	210.85428
-39.72934	31.242197	2018341.0810	0.92046833	1.0	207.41763	213.06798	210.81522
-38.953762	32.353115	2018341.0810	0.9834509	1.0	197.8311	203.8655	208.25858
-39.216164	32.512688	2018341.0810	0.9926559	1.0	196.05836	201.1664	208.25858
-39.563175	32.65224	2018341.0810	0.98055524	1	197.14621	201.19852	208.40701
-38.027687	-21.6179	2018343.1115	0.3639546	0.0	229.13321	231.03796	233.5311
-38.204315	-21.023535	2018343.1115	0.39649698	0.0	228.21112	228.22955	233.82797
-45.837246	5.8756213	2018344.0840	0.24405126	0.0	216.17632	217.75449	216.86479
4.236436	-78.26285	2018345.1545	0.9977435	1.0	190.92268	197.98955	193.61859
-27.325748	-58.646076	2018346.1320	0.60521376	0.0	194.53532	198.16121	197.62619
36.907608	-139.13594	2018347.2020	0.70768094	0.0	226.56645	228.01808	228.27167
37.245228	-138.93848	2018347.2020	0.54657024	0.0	229.77191	230.66109	230.12323
51.52656	-145.46184	2018347.2155	0.55950063	1	217.82988	221.45576	218.72946
9.767423	160.65523	2018347.2345	0.8855936	1.0	180.33736	186.14389	184.67273
10.009148	160.76566	2018347.2345	0.95528674	1.0	178.79471	184.35341	184.67273
8.975351	160.7816	2018347.2345	0.9943351	1.0	179.65585	185.88232	184.76648
10.0369215	161.0194	2018347.2345	0.9611962	1.0	179.33035	185.37096	184.8446
8.529422	161.0557	2018347.2345	0.99968696	1.0	180.81041	182.35187	185.00085
2.4273522	167.1874	2018348.2255	0.4953424	0.0	187.40387	188.66159	188.36649
3.9793653	167.5576	2018348.2255	0.92832476	1.0	181.46971	181.97867	186.9368
3.5453842	167.4887	2018348.2255	0.9666764	1	182.00345	187.42227	187.31961
0.6820659	167.74335	2018348.2255	0.9437911	1.0	187.40387	190.93369	187.44461
42.59008	164.86183	2018349.0020	0.1234592	0.0	228.36348	228.92418	229.1299
43.886547	166.41348	2018349.0020	0.22619304	0.0	221.33784	223.21298	222.59474
43.64894	166.36499	2018349.0020	0.41468945	0.0	221.30666	222.93044	226.21193
42.998768	166.53125	2018349.0020	0.8341815	0.0	220.47351	222.45659	229.0674
42.402073	166.34389	2018349.0020	0.13827385	0.0	227.51376	228.09656	228.91115
43.76174	-137.19266	2018349.2005	0.5050894	0.0	226.93585	228.61351	230.0936
45.808064	-136.43771	2018349.2005	0.5890252	0.0	226.80824	228.6405	230.12485
45.624363	-136.13551	2018349.2005	0.5068995	0.0	227.9192	229.86024	230.37875
47.38414	-134.01077	2018349.2005	0.28697163	0.0	225.05092	226.23433	227.73422
46.64578	-134.22316	2018349.2005	0.077735126	0.0	229.5959	229.58496	229.79672
46.144814	-134.24208	2018349.2005	0.35343593	0.0	227.7378	229.46893	230.60532
47.114887	-133.4015	2018349.2005	0.30743298	0.0	225.60391	226.68088	227.75375
47.664925	-132.8458	2018349.2005	0.29442582	0.0	222.43439	224.50705	223.63266
48.831234	-131.84177	2018349.2005	0.38709784	0.0	217.27873	219.87062	219.11801
49.169044	-131.40448	2018349.2005	0.11934471	0.0	218.50693	218.99838	218.57895
39.633682	-142.48578	2018349.2010	0.923991	1	227.03491	228.90892	234.035
40.141087	-141.49861	2018349.2010	0.755491	1	228.84569	229.8232	234.69907
41.919056	-140.95988	2018349.2010	0.39103064	0.0	227.51376	229.29971	228.89047
40.399044	-141.10939	2018349.2010	0.40707552	0.0	228.15561	229.39383	230.51938
41.014774	-140.81584	2018349.2010	0.32484326	0.0	228.25272	228.7673	230.30453
40.69154	-140.73886	2018349.2010	0.66634005	0.0	227.58388	229.56628	232.81625
41.37725	-140.50429	2018349.2010	0.6471175	0.0	225.44437	227.00343	229.68344
41.932987	-139.9296	2018349.2010	0.512851	0.0	226.3809	227.41092	229.79282
42.222145	-139.61438	2018349.2010	0.56661004	0.0	226.0943	227.19374	230.51938
42.95188	-138.86366	2018349.2010	0.83367556	1	224.86057	226.6028	229.56235
42.360672	-138.64778	2018349.2010	0.76211727	1	224.99242	226.66858	230.66782
42.52485	-137.97258	2018349.2010	0.78815997	1	228.81825	232.07706	231.77719
49.116512	-177.8797	2018349.2325	0.1372016	0.0	221.83467	223.21756	222.60896
7.565131	108.32868	2018350.0255	0.9829859	1.0	182.56647	190.02635	186.1135
9.3741255	108.856766	2018350.0255	0.9977609	1.0	184.6283	191.23871	190.54318
49.338264	-171.89377	2018350.2230	0.75008535	0.0	225.54593	229.00421	225.54675
48.44008	71.485085	2018351.0640	0.62819016	0.0	215.12056	217.53041	216.11565
48.14788	71.41339	2018351.0640	0.7413552	0.0	216.02188	220.3834	216.38713
46.364853	76.93065	2018352.0550	0.4533139	0.0	222.0353	223.41049	224.14899
46.91253	13.202743	2019012.1040	0.99459994	0.0	203.9525	207.23274	204.75046
35.907326	76.869965	2019013.0625	0.51228184	0.0	213.5591	217.10536	216.81378
36.12237	77.08168	2019013.0625	0.33750597	0.0	213.75687	215.54254	216.81378
36.328	77.6656	2019013.0625	0.3847079	0.0	212.19	216.3527	212.73663
35.014214	110.4303	2019014.0355	0.16345657	0.0	219.90044	220.31726	220.25125
39.626583	14.526966	2019014.1025	0.5335393	0.0	218.24371	220.22032	223.87683
40.73867	69.62128	2019015.0615	0.23579259	0.0	211.23752	212.73431	212.04175
42.89974	44.428844	2019015.0750	0.81719	0.0	209.04059	211.05664	210.01328
40.353043	46.573193	2019015.0755	0.6410567	0.0	213.08861	215.83719	214.12216
39.69229	46.35305	2019015.0755	0.9294249	0.0	213.52304	217.2364	217.06601
39.75913	46.697315	2019015.0755	0.63484097	0.0	214.18575	215.36658	214.4791
35.50324	33.366386	2019016.0840	0.83565897	1	224.87523	225.83179	227.89664
-20.39736	38.749687	2019022.0815	0.93063605	1	188.33815	196.6059	191.88074
4.2273765	6.6694164	2019022.0950	0.9982052	1.0	190.11055	195.92763	191.13184
-58.517162	-6.144148	2019037.0925	0.38240677	0.0	227.52777	227.85657	229.32056
-56.703884	-69.802666	2019050.1525	0.56520134	0.0	218.11162	222.8092	221.02647
-55.268948	170.63402	2019052.2325	0.41787228	0.0	225.92169	225.60295	230.10196
-58.420532	-139.65576	2019056.1810	0.25491464	0.0	217.0432	219.11554	217.9984
-58.6806	-139.68771	2019056.1810	0.18907209	0.0	217.8963	219.00372	218.88731
-59.182552	-139.89578	2019056.1810	0.6018988	0.0	218.27667	220.4342	222.19249
-58.96291	-139.1867	2019056.1810	0.45970234	0.0	217.26193	219.61595	219.86046
-59.25039	-139.08994	2019056.1810	0.50716597	0.0	217.77998	219.63683	221.37218
-59.537148	-139.13826	2019056.1810	0.44483912	0.0	219.30522	221.64122	221.37218
-44.14018	-107.8196	2019057.1710	0.8285747	0.0	225.02168	226.48735	230.43503
-45.1072	-108.08153	2019057.1710	0.30853721	0.0	229.14688	230.03384	231.89597
-58.072178	-167.69267	2019058.1935	0.75702286	0.0	217.31229	220.67162	222.65024
-58.037003	-165.60393	2019058.1935	0.33037096	0.0	220.85231	222.69211	222.89438
-20.484127	-178.14975	2019058.2240	0.88244027	0.0	189.37418	198.13676	190.16968
-6.064308	101.58498	2019060.0415	0.99616027	1.0	185.94046	197.4539	186.97156
-4.6684003	158.44983	2019061.0005	0.999782	1.0	187.24042	194.28714	193.14108
-6.0312467	159.05873	2019061.0005	0.987955	1.0	187.20766	193.50098	191.22702
-1.2098877	-31.573814	2019061.0050	0.49344957	0.0	194.67119	198.58475	195.06296
-13.790976	107.36031	2019061.0325	0.9983229	1.0	189.71341	198.51271	192.02298
30.759151	87.7105	2019062.0535	0.825095	0.0	220.42596	222.3666	226.21777
31.036842	87.94107	2019062.0535	0.6360346	0.0	221.0094	222.68744	225.10449
-34.758972	57.91189	2019062.0550	0.49759945	1.0	212.15298	216.32332	213.18066
-35.51054	58.450867	2019062.0550	0.83468086	1.0	210.34352	215.31784	212.93066
-35.919918	58.44855	2019062.0550	0.82756096	1.0	209.88072	212.65363	212.94824
-36.45795	58.610764	2019062.0550	0.7465405	1.0	205.4416	207.64552	213.13965
-35.366844	59.033012	2019062.0550	0.38419876	0.0	212.28241	214.48196	212.93066
-36.38148	59.452133	2019062.0550	0.66197395	1.0	208.14565	209.96703	212.78613
-47.267002	49.790516	2019062.0555	0.14132527	0.0	222.46495	224.73999	223.25488
-46.464943	-13.1441765	2019063.0955	0.091193914	0.0	224.93385	225.36809	225.46866
-46.07055	-12.383266	2019063.0955	0.47833964	0.0	224.10765	225.00148	226.60928
53.35141	-4.8570223	2019065.1235	0.5647919	0.0	225.4153	225.94553	229.31625
53.69725	-4.4266458	2019065.1235	0.50017184	0.0	225.6618	226.18846	229.30453
56.15876	-55.9968	2019067.1540	0.21736915	0.0	225.84961	226.9099	226.72635
55.814175	-55.688457	2019067.1540	0.11936539	0.0	226.06558	226.7383	226.3201
56.54882	-54.944096	2019067.1540	0.1292422	0.0	224.40407	225.32089	224.85135
32.480843	2.675003	2019068.0955	0.1862711	0.0	214.54048	216.75473	215.1358
32.174232	2.7582858	2019068.0955	0.38984767	0.0	214.69931	217.15671	216.84967
33.44851	3.0387535	2019068.0955	0.33404836	0.0	213.77481	216.28804	216.12994
38.557293	-65.46591	2019068.1450	0.2505049	0.0	216.68794	218.55194	216.81522
56.28505	-159.27678	2019068.2255	0.77896786	0.0	226.45235	227.59074	230.1153
58.712112	-154.07518	2019068.2255	0.20222168	0.0	221.05644	221.85928	223.94537
57.873478	-6.2532687	2019069.1205	0.2759284	0.0	218.4905	220.46461	218.83887
58.45757	-4.1548076	2019069.1205	0.5375111	0.0	215.59048	218.71411	216.0747
58.610134	-3.686732	2019069.1205	0.3991724	0.0	215.78073	218.79486	215.97314
56.29791	-14.804749	2019069.1210	0.675847	1	220.25134	223.37845	223.58545
55.469738	-14.927437	2019069.1210	0.68016225	1	224.12251	226.8324	226.0542
56.737564	-14.187133	2019069.1210	0.8419819	0.0	221.02507	223.62946	223.87451
55.726105	-14.550165	2019069.1210	0.61090964	0.0	225.42984	227.1897	225.9585
56.308105	-13.572892	2019069.1210	0.8497901	1	218.53973	220.96199	224.65381
56.250996	-13.234383	2019069.1210	0.546779	0.0	219.78831	219.93265	224.22998
57.390835	-12.260098	2019069.1210	0.5850999	1	218.86678	221.71892	221.21533
57.528664	-11.613333	2019069.1210	0.598573	1	220.20363	223.41049	220.54053
55.602432	-12.399697	2019069.1210	0.73207	1	221.4469	224.86665	225.20264
56.233475	-11.808206	2019069.1210	0.577286	0.0	222.64813	224.5247	225.14209
54.896996	-12.150226	2019069.1210	0.6762041	0.0	225.6184	227.2381	226.8667
56.249702	-11.316777	2019069.1210	0.71763897	0.0	220.63165	221.9653	223.75537
57.03298	-10.332075	2019069.1210	0.6182111	0.0	221.25981	226.44188	221.4956
55.674385	-10.292283	2019069.1210	0.6962124	0.0	222.8307	225.3295	225.95264
56.599045	-9.608071	2019069.1210	0.8246173	1.0	220.15587	223.02338	224.10693
56.421997	-9.084867	2019069.1210	0.71644074	0.0	222.5719	224.29451	224.10693
55.301174	-37.204197	2019069.1345	0.829691	0.0	220.89948	222.54631	227.37027
59.557262	-23.19753	2019069.1345	0.7579679	0.0	219.74019	222.48022	220.45523
53.93801	-39.549118	2019069.1350	0.38203603	0.0	222.38849	223.93689	224.48746
47.084507	8.9886875	2019070.0935	0.8480975	0.0	220.15587	221.74802	228.9348
47.680122	9.758056	2019070.0935	0.9051575	0.0	219.14323	222.1284	227.77269
58.685307	0.7964541	2019070.1110	0.7902438	1	216.3645	217.48538	218.91211
57.560814	-13.692442	2019071.1155	0.1773157	0.0	228.76332	229.59244	229.24254
57.618385	-12.822293	2019071.1155	0.91672736	1.0	224.69899	227.23409	230.17223
58.16197	-10.183887	2019071.1155	0.5482792	0.0	223.39003	224.74432	224.42418
56.447006	-146.5846	2019072.2055	0.34087545	0.0	226.69456	227.12505	228.30515
58.510914	157.25177	2019092.2345	0.4274196	0.0	210.87805	215.48805	213.07101
58.95874	157.94142	2019092.2345	0.26489022	0.0	211.8931	213.66466	213.0886
58.00648	160.12003	2019092.2345	0.95642143	0.0	208.20581	211.97815	212.2175
57.955822	158.77031	2019094.2335	0.7945507	0.0	211.01079	215.1036	214.60431
45.42799	-130.4566	2019095.1925	0.30952755	0.0	228.58438	230.20647	229.3474
38.990913	-149.026	2019095.2105	0.26457226	0.0	217.52994	218.5031	218.32632
38.741264	-149.06784	2019095.2105	0.26751116	0.0	217.77998	221.31836	217.83707
38.6718	-148.7467	2019095.2105	0.39197442	0.0	217.14426	219.17924	217.75113
39.185043	-147.93175	2019095.2105	0.3568108	0.0	215.36476	217.68185	218.215
39.258068	-147.33752	2019095.2105	0.447047	0.0	215.95308	219.69417	218.97574
38.745575	-147.53564	2019095.2105	0.26550767	0.0	216.87431	221.02168	217.34732
39.20161	-146.93639	2019095.2105	0.3081291	0.0	216.07341	217.90472	217.62906
36.090332	169.42921	2019098.2315	0.6770735	0.0	225.763	227.03592	228.71799
35.528263	169.36722	2019098.2315	0.9659524	1.0	222.05069	223.6067	230.21017
36.96507	169.77498	2019098.2315	0.15374747	0.0	224.19673	224.54672	226.12424
36.643517	169.92326	2019098.2315	0.15852714	0.0	222.93695	223.46082	224.2297
36.063053	170.0329	2019098.2315	0.18242247	0.0	224.96315	226.91805	225.49533
36.42681	170.32487	2019098.2315	0.097312026	0.0	223.54028	224.12518	223.78049
36.091568	170.59196	2019098.2315	0.25248414	0.0	223.7051	227.6783	224.56174
36.329235	170.81216	2019098.2315	0.11055232	0.0	223.35995	224.40097	223.78049
-7.07851	178.06146	2019102.2300	0.99895704	1.0	185.46248	193.74135	189.40671
-8.203074	-174.31194	2019103.2205	0.84153926	1.0	189.74411	193.72641	190.59174
-0.21672842	159.83736	2019103.2345	0.97112244	1.0	181.58476	189.05829	186.67548
19.095093	106.1553	2019104.0255	0.81935364	0.0	188.08269	193.10445	190.01562
-7.865114	170.7145	2019104.2250	0.9808533	1.0	188.40175	193.74135	188.90617
7.1285167	94.23747	2019105.0345	0.8095151	1	189.77478	191.50613	192.34103
7.334838	94.623184	2019105.0345	0.4400391	0.0	190.11055	193.0428	192.73947
6.409889	94.986374	2019105.0345	0.807976	1	186.5127	192.51128	192.14572
7.0642443	95.351204	2019105.0345	0.8296412	1.0	183.70248	180.6967	192.03635
6.6681986	95.3129	2019105.0345	0.9470303	1.0	184.41675	188.19847	192.05197
7.4195614	96.13651	2019105.0345	0.98520976	1.0	183.26701	187.46283	192.64572
-26.413095	164.38263	2019105.2340	0.70319617	1	222.37317	223.90987	223.4636
-45.40448	157.10217	2019109.0015	0.70300245	0.0	226.75143	228.17485	229.81183
-45.936367	157.07045	2019109.0015	0.15265317	0.0	229.69073	230.99513	229.75323
-45.142876	157.48805	2019109.0015	0.81065035	0.0	225.87845	230.708	229.77667
-35.615124	125.84292	2019109.0150	0.90161324	1.0	209.93881	211.65825	214.34933
-36.24467	125.83529	2019109.0150	0.95545924	1.0	207.80324	209.65137	213.16916
-37.793724	126.40323	2019109.0150	0.99164295	1.0	209.88072	212.694	218.34006
-44.23088	139.70297	2019110.0055	0.47348765	0.0	213.93602	215.14047	214.61078
-47.737698	151.61671	2019115.2245	0.83286804	0.0	225.56044	227.59474	230.63235
-48.45733	151.99185	2019115.2245	0.8721283	0.0	223.55528	225.45369	228.69095
-52.87779	156.89194	2019115.2245	0.41456428	0.0	219.43446	222.08052	219.8472
-48.989666	-64.67272	2019138.1435	0.2854493	0.0	218.85046	220.61624	218.95854
-49.25523	-63.676796	2019138.1435	0.29332778	0.0	218.80151	221.17041	219.59087
-49.668007	-62.994194	2019138.1435	0.37405157	0.0	217.91289	220.5102	220.01372
-39.815647	-47.490734	2019139.1335	0.26776057	0.0	213.93602	216.53406	214.07083
-36.028072	-105.597305	2019140.1735	0.66986287	0.0	212.85173	216.20557	214.68579
-36.238064	-105.54527	2019140.1735	0.5160531	0.0	213.9181	217.42899	214.68579
-32.0777	-102.61019	2019140.1735	0.98382103	1.0	201.91202	204.39473	207.7893
-44.95142	-157.27606	2019140.2055	0.8331902	0.0	223.14885	224.50262	225.00171
-44.207	-157.09784	2019140.2055	0.47395912	1	223.98868	224.80118	225.92163
9.316506	-90.34479	2019142.1710	0.9777362	0.0	191.01192	198.84694	191.74225
9.921283	-105.01043	2019143.1755	0.67657834	1	192.46994	195.24164	193.6167
3.79992	-154.66234	2019143.2115	0.9825135	1.0	191.36674	196.28932	192.15607
-35.41137	-140.32481	2019144.1850	0.68772286	1	221.61786	223.68391	222.66533
-36.06614	-139.73732	2019144.1850	0.55916244	0.0	219.09456	220.52031	221.12822
-40.329845	-145.06555	2019144.1855	0.3580867	0.0	220.78935	222.40451	222.14091
-40.59098	-144.2343	2019144.1855	0.4060452	0.0	220.78935	222.73433	221.8958
-4.2243457	164.68166	2019144.2340	0.98684186	1.0	189.6212	196.6059	190.96564
13.051723	124.414314	2019145.0250	0.98753965	0.0	192.49857	204.98569	193.36238
47.30231	-157.73395	2019145.2230	0.46460965	0.0	228.08618	230.25041	228.36221
4.600938	58.69438	2019146.0655	0.65928775	0.0	191.36674	197.44131	194.27025
3.4895911	58.74813	2019146.0655	0.99802655	1.0	182.22974	187.09488	194.02806
4.1211257	58.98166	2019146.0655	0.81440204	0.0	191.30783	196.20946	194.239
3.252833	59.29183	2019146.0655	0.9480081	0.0	192.0381	194.53336	194.10619
3.2279587	60.03018	2019146.0655	0.9976687	0.0	191.30783	196.64516	193.93431
35.7393	81.82967	2019147.0550	0.4313394	0.0	224.78716	229.62978	225.25945
46.77703	-32.98719	2019149.1350	0.8166704	0.0	219.45058	221.39696	221.91293
46.912582	-32.208096	2019149.1350	0.44136816	0.0	219.09456	221.67036	220.16489
44.317932	-33.544064	2019149.1350	0.6949524	0.0	213.30627	216.42305	213.5438
46.308556	-32.088326	2019149.1350	0.71799904	0.0	213.487	216.16423	217.09995
45.374546	-32.131386	2019149.1350	0.766862	0.0	211.61319	214.81323	215.51279
46.473087	-31.013462	2019149.1350	0.36748868	0.0	216.02188	217.8603	216.42978
44.610493	-31.692085	2019149.1350	0.34392762	0.0	215.0331	218.45961	215.10141
33.84612	130.22232	2019150.0125	0.5546385	0.0	216.19347	217.63148	216.59824
58.897648	104.92785	2019152.0425	0.51969075	0.0	214.39886	217.60345	215.50241
57.868923	63.386684	2019155.0635	0.8793928	0.0	223.6602	227.86049	227.21909
58.571808	-3.1526418	2019168.1235	0.68571645	0.0	227.17615	229.12958	229.18811
59.583515	5.407136	2019172.1035	0.76436836	0.0	227.33112	229.52513	229.44684
50.0184	77.771	2019173.0625	0.96257	1	217.52994	221.50957	220.73657
47.639153	82.02199	2019173.0625	0.9020586	0.0	221.5713	225.26074	223.17212
54.34949	36.166626	2019174.0845	0.9980317	1	214.18575	218.00443	218.49582
47.54939	20.337877	2019174.1025	0.94412476	1	213.82858	217.05391	214.33871
45.859295	20.547985	2019174.1025	0.92676246	1	214.99806	217.91026	219.40366
45.983105	-15.558402	2019175.1245	0.6216216	0.0	227.10558	228.03773	227.23499
45.453228	-15.385351	2019175.1245	0.45691139	0.0	227.28888	229.36751	228.59827
42.34855	26.791773	2019177.0920	0.78464454	1	215.19044	216.30571	217.6723
42.193977	27.497107	2019177.0920	0.96810424	1.0	213.68504	214.81323	219.3681
32.647633	-80.21445	2019180.1630	0.71439344	0.0	206.74048	210.116	207.34312
29.55657	-78.406654	2019180.1630	0.8680353	0.0	202.1636	208.29214	202.90562
29.045345	-78.57821	2019180.1630	0.9838637	1.0	198.82608	204.44142	204.765
27.078545	-77.93833	2019180.1630	0.99627763	1.0	194.4263	201.60152	202.24156
27.466978	-77.5011	2019180.1630	0.9857712	1.0	198.00688	202.88034	202.78062
26.822653	-77.23729	2019180.1630	0.6278152	0.0	201.98079	205.5982	202.21812
-32.865414	-54.233185	2019193.1300	0.8941002	1	209.95815	211.28476	218.83563
-34.749302	-53.198708	2019193.1300	0.23825754	0.0	214.61115	216.08727	215.2044
-53.55567	-75.85771	2019199.1405	0.17217766	0.0	205.07912	208.0355	205.26804
-56.091843	-75.76675	2019199.1405	0.8692036	0.0	201.49733	210.74689	202.67429
-55.228725	-74.8554	2019199.1405	0.6993592	0.0	201.21869	204.30107	203.2446
-57.285484	-74.065384	2019199.1405	0.26755455	0.0	202.9773	205.84601	203.25241
-52.318993	136.10655	2019220.0110	0.24920514	0.0	214.78737	217.1396	214.79544
-46.953968	45.41242	2019220.0745	0.19148761	0.0	219.25667	221.40186	219.28769
-46.522655	46.041954	2019220.0745	0.6709453	0.0	215.41692	218.04309	220.15488
-36.579258	-179.91792	2019220.2235	0.23160002	0.0	215.69432	217.20229	217.30893
-48.970783	-6.5725255	2019222.1050	0.28578854	0.0	222.34254	225.1961	222.77628
-48.49373	-6.4090257	2019222.1050	0.6699781	0.0	222.46495	223.59308	223.80899
-42.22326	170.59882	2019222.2220	0.59527993	0.0	216.9926	218.70874	221.69258
-43.854485	168.27397	2019222.2225	0.9089194	1.0	211.78133	214.02531	218.53194
-43.543114	168.43095	2019222.2225	0.7524181	1.0	214.2391	216.99089	218.29561
-44.222168	168.34851	2019222.2225	0.44956145	0.0	214.99806	215.36658	218.53194
-43.600204	168.84224	2019222.2225	0.3105528	0.0	216.3645	218.38881	218.45576
-43.1588	169.13618	2019222.2225	0.6733268	1	215.38216	220.1794	218.57735
-43.125023	98.02904	2019223.0320	0.554936	0.0	220.42596	221.50957	221.51183
-44.072464	98.22684	2019223.0320	0.750862	0.0	218.1777	221.1011	221.05089
-42.811993	98.69101	2019223.0320	0.9517202	0.0	220.42596	224.97543	221.05577
-42.40708	99.2363	2019223.0320	0.3280054	0.0	220.12401	220.64647	221.28722
-44.743793	98.87439	2019223.0320	0.71531796	0.0	219.64383	220.5102	220.82921
-43.309353	99.412735	2019223.0320	0.7427322	0.0	217.64677	218.93428	220.85167
-43.617924	99.310196	2019223.0320	0.83073795	0.0	218.47406	221.17534	220.85167
-43.40639	99.823235	2019223.0320	0.7438161	0.0	217.02634	219.6055	220.15831
-44.286674	99.66838	2019223.0320	0.87108934	0.0	215.0506	219.40108	220.07726
-43.67996	100.06909	2019223.0320	0.8139693	0.0	215.90143	217.99892	220.15831
-44.77245	99.84986	2019223.0320	0.5670631	0.0	215.45169	216.22327	217.70934
-44.17595	100.26265	2019223.0320	0.67284536	0.0	217.11058	219.18456	219.75206
-44.670906	100.38438	2019223.0320	0.7850034	0.0	214.52281	216.18785	218.53722
-43.348812	106.552155	2019224.0225	0.65220636	0.0	221.74187	223.3142	225.29364
-44.777336	107.34953	2019224.0225	0.45149708	0.0	222.76993	225.55186	224.00067
-45.069706	107.26652	2019224.0225	0.27250323	0.0	223.2997	224.11176	224.00067
-45.638325	107.380005	2019224.0225	0.34128436	0.0	222.72427	224.0222	223.87177
-45.984135	107.73326	2019224.0225	0.33413863	0.0	223.07326	224.21443	224.14325
-42.354614	109.82642	2019224.0225	0.6728572	0.0	223.22432	225.1357	224.25262
-42.666798	110.00316	2019224.0225	0.7397303	0.0	221.54022	223.97282	224.25262
-40.92744	111.10023	2019224.0225	0.4967703	0.0	223.45018	224.38324	224.04169
-41.639465	111.34309	2019224.0225	0.42094943	0.0	222.98242	223.7971	223.25653
-41.528423	119.27002	2019225.0130	0.6216504	0.0	224.06305	224.92763	224.93576
-55.135887	57.27783	2019225.0450	0.65967673	0.0	220.33078	221.59738	222.01631
-55.435787	57.26267	2019225.0450	0.72105426	0.0	219.5634	221.46555	219.64558
10.756043	20.896162	2019227.0915	0.7346921	1	192.46994	197.27669	195.25937
11.68195	21.35696	2019227.0915	0.99530447	1.0	189.5904	195.38057	195.23593
11.58763	-16.178785	2019228.1135	0.56860334	0.0	198.20692	202.16252	198.47633
15.4437475	-124.9841	2019229.1855	0.5914079	0.0	198.9979	200.98358	201.19174
15.585809	-124.69502	2019229.1855	0.77262884	1	197.19731	199.44342	201.19174
15.380702	-124.0547	2019229.1855	0.9210807	1	199.24214	203.77936	200.0433
16.196144	-123.40629	2019229.1855	0.9994661	1.0	198.70297	200.66835	200.32455
45.71765	-176.6559	2019229.2340	0.4593778	0.0	211.9117	214.45053	213.93709
31.739994	174.854	2019229.2345	0.95897305	1	194.01492	198.08778	200.29646
37.603416	177.4688	2019229.2345	0.6946049	0.0	205.90657	212.94835	206.23787
37.853897	177.92471	2019229.2345	0.3584648	0.0	206.59561	208.82117	206.68709
46.521084	-167.77702	2019230.2245	0.84869224	0.0	221.89648	222.26678	227.85645
47.228764	-166.65228	2019230.2245	0.81637615	0.0	218.94821	222.24295	224.34863
47.01369	-165.73541	2019230.2245	0.8116436	0.0	217.46306	220.33766	221.69824
17.636753	175.73027	2019230.2255	0.99410313	1.0	194.12503	198.87064	195.10254
17.785997	176.82567	2019230.2255	0.9868967	1.0	190.59386	196.81447	195.74316
25.595097	-78.36443	2019231.1520	0.71557826	0.0	209.31569	217.00235	211.43025
38.85315	-68.6521	2019231.1520	0.740101	1	208.00496	213.5477	209.50056
53.958553	142.21588	2019232.0245	0.87650484	0.0	220.89948	226.12163	223.73048
59.826435	-30.371937	2019232.1415	0.40199807	0.0	225.35718	227.38687	225.39005
54.308178	-135.482	2019232.2055	0.11993821	0.0	223.01271	223.85129	223.78429
45.862743	148.0186	2019234.0055	0.3060268	0.0	223.72006	224.70932	226.83461
46.01589	148.78696	2019234.0055	0.6428854	0.0	222.20448	223.49281	223.69203
58.37357	-145.5436	2019238.2015	0.55466026	0.0	222.95213	224.05806	227.09648
58.627846	-145.25342	2019238.2015	0.61709493	0.0	223.6452	225.17026	227.45195
57.359085	132.42212	2019256.0155	0.54931825	0.0	214.50513	217.17381	217.48657
33.046764	150.46979	2019263.0030	0.96211106	1.0	198.3812	202.97975	198.92682
12.232581	155.96648	2019265.0025	0.9059506	1.0	192.81209	199.00047	194.89114
11.837978	156.06007	2019265.0025	0.4414685	0.0	194.17998	197.54196	194.89114
11.97489	156.41673	2019265.0025	0.9898623	1.0	188.71814	195.55988	194.89114
-10.280753	-178.74474	2019266.2240	0.9426877	0.0	190.56383	196.56657	194.77333
6.3756123	68.31113	2019268.0550	0.7876039	0.0	198.43085	204.81175	200.36087
6.399612	68.72412	2019268.0550	0.9516895	1	195.21019	196.32913	200.32181
-34.27117	158.59045	2019271.0000	0.98880494	1.0	207.56007	209.86975	217.6503
-34.010834	158.73453	2019271.0000	0.9974298	1.0	211.1243	214.46309	217.85635
-43.483955	-55.010193	2019302.1410	0.6576719	0.0	221.15039	222.64047	223.2978
-45.956707	-16.578232	2019304.1040	0.82950187	0.0	222.66338	224.3744	225.97623
-45.857243	-16.127132	2019304.1040	0.9471026	1	222.5719	223.87383	224.94302
-46.447346	-16.098274	2019304.1040	0.5445222	0.0	223.80972	225.26074	224.29654
-45.490726	-15.5383625	2019304.1040	0.91336817	0.0	225.3717	229.2884	225.49576
-46.708416	-15.988963	2019304.1040	0.30626306	0.0	222.8459	225.33807	224.29654
-46.33938	-15.50991	2019304.1040	0.35998827	0.0	223.23941	222.78114	224.26724
-47.07876	-15.78736	2019304.1040	0.11020895	0.0	223.37498	223.69756	223.69888
-46.370136	-14.59055	2019304.1040	0.4972163	0.0	222.58716	224.16089	224.41568
-46.961388	-14.237225	2019304.1040	0.74351287	0.0	222.21982	223.19911	223.97623
-55.76602	-170.72948	2019304.2035	0.18334945	0.0	228.69455	229.81947	230.52112
-55.679157	-170.05809	2019304.2035	0.3120261	0.0	229.51451	230.56706	232.26721
-56.258217	-169.94562	2019304.2035	0.13174541	0.0	228.51544	229.69684	228.65979
-56.132736	-169.3359	2019304.2035	0.19049379	0.0	229.78543	230.92717	229.8844
-41.792538	-121.08896	2019305.1755	0.65915924	0.0	216.63698	218.3506	216.65414
5.642871	139.43906	2019308.0145	0.98357993	1	193.17952	200.69022	194.16608
5.2704883	139.66228	2019308.0145	0.97704667	1	192.09595	199.4203	194.16608
0.39585257	139.52457	2019308.0145	0.85836506	0.0	193.43195	200.71207	194.45514
4.3904977	140.58269	2019308.0145	0.92134565	0.0	189.52873	195.60103	194.50983
8.981665	149.83592	2019309.0050	0.99935466	1.0	183.19391	191.23871	187.00464
9.387909	149.93779	2019309.0050	0.38946342	0.0	184.94336	186.42337	186.34839
1.9857568	148.55795	2019309.0050	0.99984777	1.0	185.4281	190.15085	189.00464
9.148868	150.51968	2019309.0050	0.99969697	1.0	179.89792	189.73892	186.2937
9.120233	151.13435	2019309.0050	0.99998176	1.0	183.81052	198.54874	186.53589
16.263702	91.70238	2019310.0445	0.9991574	1.0	191.86406	198.65654	192.80534
16.672056	92.4875	2019310.0445	0.7951904	0.0	190.89293	195.60103	192.36003
4.7248917	86.08543	2019310.0450	0.97704417	1.0	189.80544	194.93285	195.19597
6.2888746	86.65608	2019310.0450	0.9259636	1.0	195.53027	199.32768	198.2741
4.8940167	86.42598	2019310.0450	0.9698882	1.0	194.77954	200.38202	195.44597
11.595505	88.798294	2019310.0450	0.86029613	1	189.83604	192.90338	193.35222
11.574031	89.26783	2019310.0450	0.77849966	0.0	192.2114	199.37404	193.50066
11.866972	90.138664	2019310.0450	0.99324715	1.0	183.26701	192.2244	193.62566
11.538445	90.19582	2019310.0450	0.9598919	1	187.24042	195.35286	193.85222
12.473544	90.68612	2019310.0450	0.99675745	1.0	183.4854	190.79668	193.8366
9.168107	90.16843	2019310.0450	0.7555792	0.0	194.56252	201.53835	196.23503
11.938782	91.27599	2019310.0450	0.9568184	0.0	189.46698	193.8754	194.20378
12.521995	91.511444	2019310.0450	0.99745494	1.0	193.4599	199.25797	194.12566
18.61144	86.3438	2019312.0435	0.851274	1	194.61688	201.63304	195.14682
18.3347	86.449936	2019312.0435	0.9561066	1.0	193.15137	204.63655	195.14682
17.742493	86.78106	2019312.0435	0.98132056	1.0	192.41263	198.76384	194.73276
35.47988	-2.6026506	2019314.1055	0.2508472	0.0	212.20848	215.80727	213.7302
38.26969	5.23695	2019315.0955	0.7180334	0.0	225.9649	226.7424	232.95966
38.006187	5.3322835	2019315.0955	0.15902565	0.0	226.75143	227.57483	227.75262
43.241596	8.912118	2019315.0955	0.9641513	1	213.41476	215.29346	216.61298
56.56972	-23.562431	2019317.1255	0.6805111	0.0	223.61525	224.74872	224.18706
51.105747	-55.928814	2019317.1435	0.7231645	0.0	203.88667	207.65373	204.83975
50.736958	-56.114582	2019317.1440	0.86297613	0.0	202.73021	207.7436	205.94131
57.036827	-36.500507	2019321.1230	0.15393887	0.0	215.0856	216.81833	215.93002
57.297222	-34.986244	2019321.1230	0.254197	0.0	214.2569	218.49765	214.30698
56.443985	-35.568104	2019321.1235	0.37372568	0.0	213.54108	214.50713	217.24301
56.081078	-35.008717	2019321.1235	0.5575941	0.0	212.9976	215.09747	217.37802
45.35738	-104.15391	2019342.1750	0.57069206	0.0	213.90022	216.38791	214.69495
44.152843	-92.287346	2019343.1655	0.59045756	0.0	217.96263	220.2918	219.2408
43.068306	-92.49759	2019343.1655	0.56461513	0.0	220.10805	222.08531	220.6302
42.57466	-92.641556	2019343.1655	0.30936524	0.0	220.47351	221.47533	221.60481
43.44567	-92.26096	2019343.1655	0.34617305	0.0	218.99704	221.47044	219.82771
43.709156	-92.04904	2019343.1655	0.41975707	0.0	218.80151	221.93643	219.82076
44.687366	-91.24449	2019343.1655	0.579656	0.0	217.09377	219.3853	219.024
44.183624	-91.12136	2019343.1655	0.5708062	0.0	218.76884	220.73697	219.38844
42.451122	-91.65434	2019343.1655	0.5130177	0.0	219.69205	221.11595	221.41682
43.123234	-91.38195	2019343.1655	0.73931867	0.0	219.38603	221.49489	220.62581
41.118633	-118.371925	2019345.1825	0.31867704	0.0	215.57314	216.17012	215.66399
40.240524	-117.68927	2019345.1825	0.9419024	0.0	215.57314	217.1681	217.43852
27.143679	-93.56625	2019347.1635	0.9589353	1.0	206.49185	211.00645	209.26265
-2.1903703	-73.2721	2019348.1545	0.9770007	1.0	191.80586	198.2222	193.84998
-15.944391	-65.472275	2019351.1445	0.99995947	1.0	186.71257	194.86205	196.04509
-50.223164	-66.46633	2019356.1510	0.42567423	0.0	212.41153	216.72003	212.82869
-55.921875	-92.458855	2019363.1520	0.5963659	1	227.90527	230.2028	228.15216
-56.57684	-91.03509	2019363.1520	0.9299879	1	225.42984	227.94334	229.50763
-56.35633	-90.42186	2019363.1520	0.6836047	0.0	227.58388	229.87874	230.27325
-35.458862	134.64937	2020022.0115	0.41130224	0.0	213.88232	216.23505	214.04303
-23.706865	72.52404	2020025.0500	0.6024245	1.0	194.53532	198.44043	195.32019
0.9543412	53.034218	2020027.0620	0.9912471	1.0	191.0416	197.23856	192.0279
43.56958	148.91782	2020030.0140	0.47622862	0.0	221.35344	224.00426	221.59424
43.998096	149.36032	2020030.0140	0.33994788	0.0	220.23544	223.08363	220.51831
37.969234	-43.214844	2020030.1315	0.51845735	0.0	222.80032	224.88844	225.78137
39.147667	-42.762733	2020030.1315	0.59444845	0.0	222.8307	225.64545	224.96497
39.641758	-42.501163	2020030.1315	0.2913223	0.0	224.64014	225.53479	224.67786
38.28994	-42.565212	2020030.1315	0.55249745	0.0	221.98906	223.50192	225.41614
37.781727	-42.639946	2020030.1315	0.7593664	0.0	222.35785	224.23224	225.64075
38.201557	-41.224606	2020030.1315	0.777465	1	220.64746	221.71408	225.94739
44.57482	-35.65984	2020030.1315	0.29977474	1	229.69073	230.98798	231.58997
41.98963	-155.73126	2020030.2130	0.13496435	0.0	222.35785	223.13911	223.62912
42.952286	-154.66316	2020030.2130	0.24827658	0.0	222.25055	223.34175	225.17209
42.12408	-154.92827	2020030.2130	0.19106403	0.0	222.2659	223.51106	224.92209
43.891266	-153.76616	2020030.2130	0.19916783	0.0	224.53697	225.82755	226.53537
37.37476	152.81189	2020031.0045	0.17512952	0.0	227.97491	228.60966	229.27881
36.566685	153.71127	2020031.0045	0.09301007	0.0	227.75177	227.88814	227.86475
47.44415	-135.89456	2020032.1935	0.8404648	0.0	223.45018	225.36809	229.6166
47.717026	-134.57068	2020032.1935	0.88314533	1	223.26956	225.45369	229.52089
48.394215	-134.00568	2020032.1935	0.65639365	0.0	226.26643	228.96231	228.22987
48.817326	-133.42285	2020032.1935	0.7141469	1	223.22432	225.78954	228.26698
50.29882	-132.39957	2020032.1935	0.60878533	1	220.83656	222.86989	223.45107
48.88681	-132.76717	2020032.1935	0.95675784	1.0	221.22858	223.88736	227.91542
51.259964	-131.68834	2020032.1935	0.5516872	1	224.00357	225.89502	225.15468
49.378075	-132.12213	2020032.1935	0.8754722	0.0	224.97778	227.74973	229.47011
50.44281	-131.43771	2020032.1935	0.8057541	1	221.02507	223.0929	226.97206
51.212532	-130.75299	2020032.1935	0.9433565	1.0	220.10805	222.92113	227.10292
50.717155	-130.86674	2020032.1935	0.9181163	1	222.5719	226.51625	228.03065
51.533054	-130.5169	2020032.1935	0.8214037	1.0	220.96233	223.37387	226.33144
49.52123	-130.65376	2020032.1935	0.32048887	0.0	227.24663	229.06126	228.70448
51.843292	-129.1497	2020032.1935	0.8852502	1.0	221.98906	224.35222	226.3373
51.29426	-129.10141	2020032.1935	0.5905025	1	222.86107	225.36809	227.10292
52.614624	-128.37306	2020032.1935	0.92870325	1	220.85231	223.0929	225.94081
51.476185	-128.77957	2020032.1935	0.9028315	1.0	220.15587	222.52274	227.51308
51.78298	-128.51442	2020032.1935	0.8427955	1	220.8051	223.29582	226.57167
52.130947	-128.20137	2020032.1935	0.8480943	1	221.25981	224.36551	226.72597
51.871525	-127.572876	2020032.1935	0.93547934	1	220.77359	225.05785	226.9994
52.445267	-126.82861	2020032.1935	0.16066106	0.0	226.62344	228.00629	227.69667
44.41866	-151.11426	2020033.2020	0.2232193	0.0	212.19	215.03593	213.4204
43.974255	-150.89207	2020033.2020	0.2913516	0.0	210.93497	213.65169	212.45555
45.202118	-150.32727	2020033.2020	0.24895227	0.0	212.5403	214.98044	213.26805
44.87361	-150.35039	2020033.2020	0.20559052	0.0	211.68797	213.72943	213.26805
48.362812	-149.42957	2020033.2020	0.46211392	0.0	215.2951	217.41206	216.33739
46.725647	-148.22131	2020033.2020	0.21686794	0.0	218.91566	220.31216	219.5869
54.932404	-163.71819	2020033.2155	0.26377305	0.0	219.5634	221.25433	220.21797
50.15123	-112.55421	2020034.1745	0.49455488	0.0	226.10867	227.90787	227.93452
51.01017	-109.8842	2020034.1745	0.46576944	0.0	224.43364	226.20515	224.57515
59.493946	155.18265	2020038.2350	0.6587915	0.0	201.77423	207.20775	203.93533
50.522697	31.857603	2020055.0945	0.73875374	0.0	227.10558	228.25296	233.89987
51.221214	33.055954	2020055.0945	0.13412292	0.0	225.38625	225.77261	226.84518
49.58378	-176.28125	2020055.2300	0.877132	0.0	217.11058	223.26361	217.82832
37.837994	163.82405	2020058.0030	0.43077928	0.0	212.41153	216.65625	212.77707
38.40337	164.37608	2020058.0030	0.23262572	0.0	213.4509	215.37878	213.87277
39.041843	164.83762	2020058.0030	0.30341402	0.0	214.6288	217.3725	215.92062
38.661972	164.72777	2020058.0030	0.6360715	0.0	211.33171	214.63873	214.96848
39.303165	166.05533	2020058.0030	0.6867063	0.0	212.87	216.82985	216.35764
52.45433	91.18782	2020059.0425	0.36023065	0.0	226.20912	227.06432	228.72818
32.616062	162.59488	2020060.0020	0.6909955	0.0	218.93195	223.68391	219.78333
32.51441	163.79405	2020060.0020	0.69394463	0.0	218.24371	219.03041	218.44153
32.7421	163.99487	2020060.0020	0.7338768	0.0	217.84648	219.73059	218.44153
29.919436	112.307755	2020062.0325	0.7313092	0.0	217.27873	219.29037	219.2894
46.5223	4.369013	2020062.0955	0.3081097	0.0	220.97801	222.60284	222.10056
44.038986	7.9615445	2020062.0955	0.25678033	0.0	216.9926	221.25923	217.71506
43.57802	8.5372715	2020062.0955	0.17583008	0.0	214.55815	216.9737	214.79489
44.190533	9.070393	2020062.0955	0.226985	0.0	216.21057	218.00995	217.7474
1.5430845	102.398964	2020065.0405	0.95807	1.0	191.45494	198.62068	192.20544
29.081907	68.04276	2020065.0535	0.5184171	0.0	228.8045	229.15988	233.93266
-5.0390353	114.741104	2020066.0310	0.99705184	1.0	186.64607	194.18495	189.32077
-6.9507666	115.915504	2020066.0310	0.9518991	0.0	190.1713	203.00946	192.67233
-7.5399094	116.3444	2020066.0310	0.94835716	0.0	187.92218	196.35565	190.61765
-9.800531	86.676506	2020068.0435	0.99223584	1.0	193.1232	198.16121	196.10074
-59.52861	-68.22162	2020094.1520	0.9058983	0.0	214.38115	219.08896	217.57202
-50.065144	-97.624214	2020099.1715	0.46058	0.0	222.86107	227.71799	223.61832
-58.131336	-82.78584	2020100.1445	0.5677077	1	218.55612	220.95201	221.76144
-57.8674	-81.946014	2020100.1445	0.2712601	0.0	221.78828	223.56119	222.66574
-58.3742	-82.30515	2020100.1445	0.72513056	1	217.56334	220.14868	220.83469
-57.94192	-81.55272	2020100.1445	0.24379669	0.0	222.34254	223.41507	223.09152
-57.606873	-80.896255	2020100.1445	0.13486992	0.0	223.49524	224.14304	224.56808
-55.132698	167.09743	2020100.2255	0.54975367	0.0	212.37466	214.94954	215.43275
-55.381447	167.35306	2020100.2255	0.4654222	0.0	213.08861	216.56903	213.23158
-55.16941	167.74641	2020100.2255	0.5018353	0.0	213.86443	218.41605	214.51283
-56.28726	168.12259	2020100.2255	0.46216524	0.0	212.39311	215.13434	212.9601
-55.056087	168.82098	2020100.2255	0.66496134	1	212.44836	214.55107	213.00893
-55.647144	169.14801	2020100.2255	0.48685086	0.0	211.50078	214.41272	212.55971
-56.294323	169.52312	2020100.2255	0.26450932	0.0	212.1715	214.61372	212.3058
-56.633488	169.57222	2020100.2255	0.37290293	0.0	211.81863	213.9933	212.3058
-30.15521	-103.18173	2020102.1740	0.9316269	1	204.21492	209.59079	208.30066
-23.419502	-143.91069	2020105.1950	0.88237625	1.0	193.7661	199.35088	198.81693
-42.443325	-178.27533	2020105.2135	0.8676031	1	226.33801	227.88814	233.24884
-42.214294	-178.10443	2020105.2135	0.8637938	1	228.34964	229.98592	234.7879
-43.50699	-178.6267	2020105.2135	0.8664994	1	229.65012	231.91083	233.75665
-43.436893	-177.88377	2020105.2135	0.78416485	1	228.19725	230.3162	231.79962
-42.46671	-177.18027	2020105.2135	0.7644718	0.0	226.50941	230.38547	229.68634
-43.525166	-177.32823	2020105.2135	0.67667764	1	227.11969	228.57495	230.86993
-43.28538	-177.2167	2020105.2135	0.80929524	1	225.19696	226.97906	230.86993
-41.82794	-176.56316	2020105.2135	0.7745875	1.0	224.58119	225.38095	230.5379
-42.859528	-176.81831	2020105.2135	0.7600343	1	223.98868	225.87817	229.35822
-42.5667	-176.58842	2020105.2135	0.76995146	1	224.4927	228.8898	229.68634
-41.509678	-176.13579	2020105.2135	0.6907062	1	226.30939	227.79724	231.03009
-39.94512	-174.54137	2020105.2135	0.82065797	1.0	226.4809	230.30522	229.86603
-37.433334	-93.765045	2020106.1540	0.24092928	0.0	218.19421	220.10252	219.2471
-9.186767	-174.19368	2020106.2205	0.99999213	1.0	189.49788	208.20422	192.73035
-13.331064	177.00523	2020108.2155	0.98430806	1.0	187.66391	192.51128	191.20236
-12.604297	177.72049	2020108.2155	0.9233367	1.0	187.82553	189.95486	190.57736
-12.162762	178.32907	2020108.2155	0.8590259	1.0	189.06316	193.11984	191.12424
-11.688027	178.7601	2020108.2155	0.9527493	1.0	187.50157	193.47072	192.40549
-5.3465586	40.428417	2020109.0745	0.9428895	1.0	188.84395	193.60646	191.86494
-4.8211083	40.805447	2020109.0745	0.6176757	0.0	191.0416	190.88242	191.66963
-5.123212	40.79168	2020109.0745	0.97337025	1.0	189.06316	195.11586	191.66963
-4.421157	41.02725	2020109.0745	0.98618156	1.0	190.01927	196.94385	191.5837
-5.6893363	48.467964	2020110.0650	0.6177812	0.0	187.0104	191.15443	187.69739
-5.3199058	49.135838	2020110.0650	0.743878	0.0	184.4874	184.93814	187.56458
-5.9139967	49.30874	2020110.0650	0.7448761	0.0	186.61278	192.03094	188.05676
-5.4970655	49.519245	2020110.0650	0.9974444	1.0	178.66988	185.63942	187.56458
37.95807	-2.0269475	2020110.1135	0.63248795	0.0	223.26956	227.3186	226.48085
37.631645	-2.0785184	2020110.1135	0.62631357	0.0	224.99242	225.3166	229.76991
35.657707	-2.6316636	2020110.1135	0.87063	0.0	225.71965	226.86098	234.5121
35.326294	-2.7670453	2020110.1135	0.8836961	1	225.4153	226.45844	234.5121
43.598595	1.7258748	2020110.1135	0.7087799	0.0	220.45766	225.17026	221.34804
40.30538	0.64033705	2020110.1135	0.792652	0.0	220.63165	222.05655	223.78554
42.223125	1.8645233	2020110.1135	0.27278236	0.0	222.25055	223.72926	222.72694
44.06319	3.3438413	2020110.1135	0.7832876	0.0	217.14426	219.87062	220.14296
43.78758	3.231903	2020110.1135	0.6109152	0.0	218.01234	218.58444	220.14296
40.984917	1.7977737	2020110.1135	0.6690344	0.0	221.33784	222.17618	224.1996
43.455177	3.5850425	2020110.1135	0.48565286	0.0	218.2602	220.18965	219.26405
41.14459	2.5323236	2020110.1135	0.6196271	0.0	219.88441	222.02776	221.61952
43.67543	4.7450542	2020110.1135	0.31194794	0.0	219.64383	221.612	221.65663
3.9827654	60.681263	2020111.0555	0.9627516	1.0	187.85777	192.8723	191.55307
5.441296	62.232273	2020111.0555	0.9244659	1.0	189.65196	196.31587	192.66245
51.23798	52.803898	2020112.0800	0.5005693	0.0	210.45854	213.63872	210.92535
50.561043	52.49416	2020112.0800	0.89194554	0.0	210.76396	213.0481	211.24957
43.057316	18.532837	2020112.0945	0.24169853	0.0	212.46677	214.7386	212.97086
51.70983	62.534683	2020113.0705	0.3908107	0.0	215.24281	216.34682	218.06229
51.71661	63.398186	2020113.0705	0.30246675	0.0	214.38115	215.74734	215.9827
37.220345	-98.21824	2020115.1650	0.9773243	1.0	214.5758	217.43466	221.4458
37.609474	-98.11613	2020115.1650	0.9901361	1	214.29242	217.83806	220.65381
39.71581	-95.99063	2020115.1650	0.38223067	0.0	214.16794	216.10507	214.26025
53.75554	-125.29394	2020118.1855	0.42794478	0.0	224.59593	224.6347	225.74927
44.015076	-90.03933	2020139.1740	0.5718232	0.0	220.44182	224.12071	221.1442
45.69059	-117.34723	2020139.1915	0.2358535	0.0	222.09688	224.62592	222.69739
19.275675	-81.40503	2020144.1625	0.91705614	1	193.23573	198.16121	198.1966
29.075981	-90.80747	2020146.1610	0.28633678	0.0	208.14565	210.71788	208.75156
7.8734503	-82.71637	2020146.1615	0.9999753	1.0	187.88998	196.42178	193.42343
7.842553	-82.242714	2020146.1615	0.9649717	1	191.24883	200.30434	193.42343
7.9407673	-80.29867	2020146.1615	0.9998869	1.0	180.88863	191.01886	190.8453
6.7990847	-79.982124	2020146.1615	0.9065358	0.0	188.93805	195.49109	191.86874
8.20583	-165.80508	2020147.2155	0.96815944	1.0	194.88763	200.723	199.14975
13.8816395	-90.75476	2020148.1600	0.31540194	0.0	194.17998	197.70462	194.66544
-36.280037	-177.8741	2020157.2105	0.4089173	0.0	224.44841	225.88658	226.86612
-56.208385	-175.64848	2020163.2035	0.1436253	0.0	226.29507	227.06837	226.49127
-44.980488	116.76583	2020182.0255	0.38467014	0.0	224.4927	229.24689	226.22202
-45.670906	76.98784	2020183.0515	0.35715294	0.0	218.86678	221.92677	220.40462
-46.68286	79.032555	2020183.0515	0.28611025	0.0	218.45767	220.40373	218.74837
-43.921295	87.29186	2020184.0420	0.7379979	0.0	219.36989	221.4851	223.24911
-43.881092	87.93058	2020184.0420	0.8379747	0.0	217.9792	221.42148	223.212
-43.5407	88.22366	2020184.0420	0.8767877	0.0	218.6544	222.5133	223.88779
-43.88843	88.36078	2020184.0420	0.5380981	0.0	219.45058	221.45085	223.212
-44.38347	88.54079	2020184.0420	0.8734269	1	217.92949	223.96382	221.15414
-43.39079	88.91915	2020184.0420	0.79132646	0.0	219.02957	220.46461	221.6102
-43.075455	89.2831	2020184.0420	0.91382885	1	219.09456	221.44106	221.05594
-44.146835	89.214096	2020184.0420	0.5042513	0.0	219.20808	220.74702	220.81116
-45.068268	88.99535	2020184.0420	0.51506704	0.0	216.9757	217.36684	219.96371
-43.930035	89.30293	2020184.0420	0.7359035	0.0	217.82988	219.38002	220.81116
-45.342255	89.64291	2020184.0420	0.6578317	0.0	217.71341	220.79713	219.00497
-43.78341	90.16267	2020184.0420	0.89126563	1	217.34583	219.03572	220.03867
-44.286392	90.376755	2020184.0420	0.90283465	1	216.94193	218.89146	219.35556
-43.84049	91.10259	2020184.0420	0.78051	0.0	215.7289	218.961	219.27646
-44.07213	91.07193	2020184.0420	0.8799719	0.0	214.73457	217.32155	219.27646
-50.776363	112.64782	2020185.0150	0.46319628	0.0	217.37933	218.91823	219.14603
-50.290604	114.87897	2020185.0150	0.583475	0.0	212.31934	214.90005	213.27103
-50.868595	115.33066	2020185.0150	0.6946658	0.0	211.33171	215.7353	213.36673
-40.613514	99.76646	2020185.0325	0.80997264	1	219.82036	221.31343	221.50266
-42.12712	99.535255	2020185.0325	0.9244218	1	218.52333	223.29582	220.2734
-40.697174	100.17322	2020185.0325	0.32495394	0.0	220.63165	221.9653	221.50266
-40.925137	100.36407	2020185.0325	0.31321627	0.0	220.64746	221.8786	220.84445
-40.159977	100.82025	2020185.0325	0.36299562	0.0	220.69478	221.84477	222.1091
-40.622383	100.778885	2020185.0325	0.55499434	0.0	218.47406	220.81215	221.52902
-42.01604	101.01367	2020185.0325	0.8214993	0.0	218.55612	220.46461	220.1373
-42.08987	101.357155	2020185.0325	0.37282518	0.0	219.06209	221.43616	220.1373
-41.57235	76.619194	2020185.0505	0.8506739	1	225.60391	227.3949	228.8129
-38.373108	77.68963	2020185.0505	0.8829988	1.0	219.43446	220.88716	226.76602
-38.390167	78.17029	2020185.0505	0.8011827	1.0	219.77228	222.55104	225.74844
-39.25832	78.31816	2020185.0505	0.76612335	0.0	223.52528	224.9102	227.43985
-39.474636	79.81259	2020185.0505	0.23291704	0.0	222.75471	223.89636	222.78555
-42.047443	51.576286	2020185.0645	0.4660984	0.0	212.46677	215.08519	213.68185
-41.691284	51.920494	2020185.0645	0.45978105	0.0	212.24548	214.82567	213.72678
-41.513973	52.81932	2020185.0645	0.40584263	0.0	212.94295	215.53645	213.10959
-42.76658	52.70165	2020185.0645	0.70143986	0.0	208.72426	212.64014	213.10764
-44.445236	52.324253	2020185.0645	0.3361128	0.0	211.76268	215.43951	212.01193
-43.867416	52.583775	2020185.0645	0.45278996	0.0	211.42572	215.83719	212.50412
-41.932766	53.11526	2020185.0645	0.50657165	0.0	211.31288	215.1036	213.20334
-44.14815	52.58443	2020185.0645	0.38482508	0.0	211.72534	217.74892	212.50412
-43.31666	53.026054	2020185.0645	0.5826142	0.0	209.15866	211.54607	212.39474
-43.07867	53.15658	2020185.0645	0.7775655	0.0	208.76392	212.9217	212.65451
-42.327183	53.43125	2020185.0645	0.7488412	0.0	210.7259	214.40012	212.98654
-42.289783	54.213512	2020185.0645	0.67172956	0.0	210.916	214.36224	211.35178
-45.73829	33.08607	2020186.0725	0.1740381	0.0	215.24281	216.5923	215.39502
-45.33965	33.294197	2020186.0725	0.22580999	0.0	214.91037	216.67368	215.39502
-34.919983	-28.420246	2020186.1220	0.25114173	0.0	225.60391	226.19681	228.11575
-34.467884	-27.957043	2020186.1220	0.4275589	0.0	224.87523	224.86665	229.31107
-35.59349	-27.134373	2020186.1220	0.48363513	0.0	222.37317	223.68848	223.26224
-29.254374	-24.967596	2020186.1220	0.2065133	0.0	219.70808	221.13576	220.36575
-39.6671	-77.20884	2020186.1540	0.53495044	0.0	220.42596	221.02666	223.39816
-36.164635	-75.76491	2020186.1540	0.30571347	0.0	224.03333	223.73381	224.15598
-37.799995	-75.720436	2020186.1540	0.85450053	1	218.6544	221.52422	220.8591
-37.607273	-75.59848	2020186.1540	0.9034634	1.0	218.94821	221.35767	222.57199
-38.029625	-75.59331	2020186.1540	0.5006918	0.0	219.49896	222.34286	220.8591
-39.322933	-75.767876	2020186.1540	0.77238595	0.0	217.4798	219.74619	219.91965
-38.494766	-75.56087	2020186.1540	0.6162782	0.0	217.99579	220.31726	220.70285
-38.766773	-75.52262	2020186.1540	0.5281443	0.0	218.14467	220.8322	220.45285
-39.897537	-75.632614	2020186.1540	0.33046278	0.0	219.14323	220.56075	219.7634
-37.220016	-75.13503	2020186.1540	0.8584385	0.0	219.59557	222.21915	222.30637
-37.922638	-74.745186	2020186.1540	0.6787401	0.0	218.70349	222.55577	218.91183
-35.159794	-74.07177	2020186.1540	0.23415148	0.0	229.3514	230.39275	229.93723
-38.326614	56.967842	2020188.0535	0.67841434	0.0	215.93587	219.53752	216.73187
-0.08307037	-64.234795	2020188.1515	0.98767465	1.0	195.92696	203.03917	196.09589
-3.0756578	-64.66254	2020188.1515	0.9845292	1.0	188.14671	195.40825	195.34589
-36.4255	68.85241	2020189.0440	0.7398964	0.0	219.96439	220.10252	223.90237
-41.494923	-7.5496917	2020189.0935	0.40911654	0.0	207.33609	209.87724	210.67065
-42.097244	-6.9581227	2020189.0935	0.37369353	0.0	207.80324	210.13826	209.79565
-41.70879	-5.7068834	2020189.0935	0.52115256	0.0	207.193	209.00024	209.18237
-42.418827	-6.093198	2020189.0935	0.4581161	0.0	208.52553	211.61626	209.06128
-41.016434	-4.740609	2020189.0935	0.83724827	0.0	206.74048	210.55777	210.7605
9.46466	-27.843555	2020189.1240	0.8888217	1	190.32272	192.8567	196.81215
-42.900597	-75.349304	2020189.1435	0.6932689	0.0	219.64383	221.98933	219.90125
-38.861214	-122.331474	2020189.1750	0.49843818	0.0	213.16127	214.81944	214.3161
-38.470562	-122.13066	2020189.1750	0.26462775	0.0	213.03401	214.56361	214.07391
-40.895054	-122.858604	2020189.1750	0.9421276	1	210.47768	212.83487	212.85321
-40.682545	-122.68039	2020189.1750	0.74012387	0.0	212.42996	215.81328	212.88446
-41.350456	-122.48642	2020189.1750	0.82229507	0.0	212.09741	213.98692	212.27509
-38.619686	-121.40923	2020189.1750	0.26335782	0.0	212.39311	213.47595	213.39032
-38.959976	-121.41039	2020189.1750	0.5207989	0.0	212.83345	219.59506	213.79657
-39.553333	-121.23367	2020189.1750	0.5823105	0.0	211.4445	213.89064	213.7829
-41.47504	-121.92815	2020189.1750	0.8579855	1	210.84006	213.9035	212.40399
-40.043846	-121.14827	2020189.1750	0.44775674	0.0	211.23752	212.68056	212.12274
-39.719048	-120.481255	2020189.1750	0.73642594	0.0	210.51596	213.74881	213.35126
-40.284164	-120.2456	2020189.1750	0.82756865	0.0	207.9042	212.86163	212.76337
-50.65766	-132.96477	2020189.1755	0.47680557	0.0	218.81784	220.5658	221.79266
-52.59714	-134.34798	2020189.1755	0.8103324	0.0	221.69539	222.41873	225.54462
-51.158684	-132.79271	2020189.1755	0.77092403	0.0	217.81325	220.68169	220.9743
-51.630245	-132.86905	2020189.1755	0.7562801	0.0	217.84648	219.18456	221.74579
-52.086	-132.92047	2020189.1755	0.6932023	0.0	217.41284	221.45576	221.60028
9.748969	-18.623343	2020190.1145	0.8022562	1	191.27834	196.11592	194.5604
-33.96808	-62.698017	2020190.1335	0.7030181	0.0	217.09377	219.39578	219.82773
-37.181396	-63.923035	2020190.1335	0.69550335	0.0	214.38115	217.06535	216.1849
-34.46603	-62.438343	2020190.1335	0.81874377	0.0	215.60779	218.19179	219.04648
-36.032745	-62.82476	2020190.1335	0.7056831	0.0	215.45169	219.31677	216.14633
-34.85238	-62.194054	2020190.1335	0.71990997	0.0	216.10774	217.70424	218.39902
-37.79466	-63.132942	2020190.1335	0.86968505	0.0	213.46895	216.81255	217.23447
-38.503006	-63.325024	2020190.1335	0.82250756	0.0	214.15015	216.80676	217.01572
-37.03374	-62.511154	2020190.1335	0.6721726	0.0	213.75687	216.87596	215.04343
28.00356	-81.77479	2020190.1635	0.7725174	0.0	200.89143	204.90343	202.23209
28.31166	-81.02523	2020190.1635	0.6186324	0.0	199.33946	201.13426	202.20084
33.384598	-76.72209	2020190.1635	0.94172007	0.0	203.11151	208.65656	207.90201
32.358723	-77.090294	2020190.1635	0.9945274	1.0	198.20692	204.0653	207.81412
-42.364117	-114.32577	2020190.1655	0.8579792	0.0	213.8465	215.65718	216.73502
15.05636	-109.47519	2020190.1815	0.9901501	1.0	191.57227	197.80414	192.85913
12.463574	-111.04526	2020190.1820	0.9968765	1	190.5037	193.53116	192.80444
11.8778305	-110.45056	2020190.1820	0.99805486	1.0	190.6838	198.24655	193.031
27.468779	-72.101845	2020191.1540	0.47018653	0.0	200.03864	203.2558	200.66905
26.554102	-72.22374	2020191.1540	0.99652344	1.0	194.28964	200.51462	200.58311
28.525482	-71.65119	2020191.1540	0.9992275	1.0	200.32474	206.2824	201.3253
27.753786	-71.69009	2020191.1540	0.99400216	1.0	198.00688	203.77936	201.02061
27.286308	-71.157	2020191.1540	0.99653196	1.0	193.0668	198.90611	201.10655
53.881714	-98.326256	2020191.1850	0.40323985	0.0	223.37498	225.84021	224.59476
53.602184	-98.58362	2020191.1850	0.19010228	0.0	224.0482	227.41895	225.39163
7.7437134	-151.30789	2020191.2040	0.40320185	0.0	197.5027	203.89415	197.54506
8.247073	-150.97693	2020191.2040	0.7731876	1	193.655	198.51271	197.42787
9.09737	-150.56451	2020191.2040	0.6713087	0.0	195.84793	199.57004	196.83412
-14.7892065	-161.9412	2020191.2050	0.9538298	1.0	196.29384	201.13426	197.631
14.286387	-94.62862	2020192.1625	0.9828167	1.0	192.69836	197.52943	199.75024
13.274097	-94.310684	2020192.1625	0.9986511	1.0	187.10915	193.56131	198.68774
13.443851	-93.698296	2020192.1625	0.9964624	1.0	188.96938	200.723	198.99243
14.262905	-93.24531	2020192.1625	0.9968646	1.0	187.72864	194.59087	200.344
13.943292	-92.34972	2020192.1625	0.95729667	1.0	188.7811	190.72781	200.6643
14.510962	-92.04023	2020192.1625	0.6188407	0.0	195.82153	197.0981	197.98462
43.24638	-100.20656	2020192.1755	0.94520175	1.0	210.80203	214.99277	213.07074
55.495056	-108.68837	2020192.1930	0.2875595	0.0	220.3149	222.69682	222.37427
55.783005	-108.11162	2020192.1930	0.79958457	0.0	217.76334	220.66661	220.87537
56.069996	-107.26034	2020192.1930	0.7669471	0.0	217.61343	221.71892	219.95386
56.234222	-106.83437	2020192.1930	0.6434951	0.0	217.32906	220.81215	219.31714
38.481728	-172.86995	2020192.2255	0.6657522	0.0	211.85587	214.85048	215.21315
39.084766	-172.4161	2020192.2255	0.62630796	0.0	209.45267	212.66707	211.85378
39.445496	-171.61334	2020192.2255	0.70415896	0.0	207.07	211.27766	209.90456
34.81742	-88.989105	2020194.1610	0.94183415	1.0	197.29935	201.12352	200.12865
34.56695	-88.05516	2020194.1610	0.9665023	1.0	198.43085	203.45103	201.7849
51.150425	-123.00736	2020194.1920	0.9608539	1	227.07732	228.928	229.7651
51.029747	-122.52143	2020194.1920	0.8930941	1	226.3809	228.4512	228.06589
51.406944	-121.02532	2020194.1920	0.35414174	0.0	225.9649	227.68623	227.17526
53.249485	-119.590645	2020194.1920	0.3437916	0.0	225.15317	225.79797	226.6948
50.67197	-120.73528	2020194.1920	0.6880863	0.0	225.22612	227.8842	230.48386
52.99113	-119.50851	2020194.1920	0.43285275	0.0	226.1661	227.1493	226.6948
50.87595	-120.565834	2020194.1920	0.46913818	0.0	224.59593	227.89603	228.3198
50.628143	-120.06297	2020194.1920	0.5984739	0.0	227.37332	228.74431	230.68307
50.93636	-119.735695	2020194.1920	0.3905893	0.0	227.98883	228.86688	228.40964
52.031784	-119.14263	2020194.1920	0.7785631	0.0	225.67627	229.262	225.8198
53.0907	-118.47829	2020194.1920	0.6928154	0.0	224.71368	226.47496	226.89597
51.429935	-119.060684	2020194.1920	0.403334	0.0	226.23778	228.31139	226.48776
53.256912	-117.94994	2020194.1920	0.89364773	1	220.56845	223.20374	225.71237
50.99651	-118.70828	2020194.1920	0.5882355	0.0	224.87523	227.33067	227.2612
53.02995	-117.53702	2020194.1920	0.7556338	1	224.38928	226.7178	227.86276
52.67567	-117.72732	2020194.1920	0.48931998	0.0	225.92169	227.53891	226.35495
52.249928	-117.547	2020194.1920	0.34191856	0.0	225.3717	227.39088	226.47604
57.15142	-113.084564	2020194.1920	0.6800191	0.0	218.93195	222.48495	221.36276
52.661522	-116.1584	2020194.1920	0.377789	0.0	225.763	227.79724	226.72604
53.053013	-115.7902	2020194.1920	0.38744792	0.0	226.43806	227.7616	227.21042
56.986996	-111.27242	2020194.1920	0.6516601	0.0	215.60779	219.41685	217.51022
56.594856	-111.33039	2020194.1920	0.6883677	0.0	216.62001	220.72694	221.06296
58.770348	-109.06579	2020194.1920	0.5877893	0.0	214.43431	217.8603	214.80612
57.495937	-110.022156	2020194.1920	0.8156794	0.0	210.17047	215.80727	213.09128
56.398335	-110.750755	2020194.1920	0.7928635	0.0	217.2955	220.19476	220.17673
55.974773	-110.8201	2020194.1920	0.83829564	0.0	217.34583	221.65578	222.11667
47.634342	119.26051	2020195.0335	0.99478465	1.0	209.68661	215.56064	214.16803
43.57925	113.89217	2020195.0340	0.5174333	0.0	220.86804	222.75307	221.5108
54.46102	-109.76745	2020195.1825	0.47638533	0.0	223.32985	225.2392	224.02164
51.8624	-109.170235	2020195.1825	0.70403326	1	221.49356	223.1299	224.94937
53.82877	-107.728775	2020195.1825	0.9926224	1	219.11078	222.4944	225.88101
52.453	-108.32198	2020195.1825	0.93325925	1	220.86804	223.15297	225.55289
52.078487	-108.43574	2020195.1825	0.89579237	1	222.37317	223.61127	224.49039
58.504932	-148.09207	2020195.2140	0.4135102	0.0	227.34518	229.61484	231.3245
45.669403	171.38852	2020195.2325	0.8361177	1	220.50517	222.21436	222.40363
48.766243	173.02684	2020195.2325	0.22158867	0.0	220.91519	222.27629	221.24884
58.168648	86.9416	2020203.0425	0.54828805	0.0	228.79077	230.23576	231.29796
59.918617	39.466286	2020213.0955	0.44343552	0.0	226.45235	228.07304	226.6138
59.273026	40.970066	2020213.0955	0.8664046	1	221.97363	228.42796	225.25052
50.06488	98.31416	2020218.0520	0.7897759	1	217.32906	219.94815	219.0124
57.36738	95.432884	2020219.0425	0.5823313	0.0	220.89948	222.6358	221.5654
51.427155	102.83334	2020219.0425	0.8829332	1	221.41576	223.2314	227.09763
51.14829	104.84256	2020219.0425	0.5871848	1	221.33784	222.4377	223.37302
48.78504	108.91473	2020219.0425	0.6008368	0.0	218.37547	218.49765	221.68747
49.070683	109.57838	2020219.0425	0.52932	0.0	217.6301	219.46414	220.7236
48.436245	110.42672	2020219.0425	0.81600004	0.0	218.2107	220.86719	220.2363
53.404152	112.66037	2020220.0330	0.34333068	0.0	217.74672	220.41896	217.96808
52.992546	112.49285	2020220.0330	0.505676	0.0	216.55197	218.60611	218.71051
52.58672	112.48399	2020220.0330	0.93553245	1	217.84648	221.47044	219.23297
52.38571	112.41565	2020220.0330	0.9978225	1	215.10309	217.39513	219.23297
49.74741	66.95877	2020220.0650	0.6612347	0.0	220.58424	221.84962	225.33412
49.446053	68.25863	2020220.0650	0.59534335	0.0	222.00447	223.87383	225.3185
47.437637	105.95572	2020221.0415	0.88990843	1	222.9218	224.63034	224.08415
42.481853	-0.04382157	2020222.1135	0.6532941	1.0	219.91644	222.42348	221.69336
42.529152	1.7169782	2020222.1135	0.9731145	1.0	214.54048	215.27515	221.07654
45.671677	83.55106	2020224.0445	0.81526476	1	218.04547	220.71185	220.60956
47.20399	14.989094	2020224.0940	0.8932414	1.0	208.78372	211.71419	212.45908
42.09704	-5.6728444	2020224.1120	0.17610198	0.0	220.20363	222.5133	220.79443
42.687138	-4.754758	2020224.1120	0.8143655	1	216.17632	217.8714	220.84912
42.221287	-4.803625	2020224.1120	0.1892288	0.0	219.24048	220.03574	221.01123
40.845264	-5.311303	2020224.1125	0.38420558	0.0	218.1612	219.66289	221.51514
41.362064	-5.1196136	2020224.1125	0.29255128	0.0	218.76884	220.76707	221.22607
41.20514	-4.5467496	2020224.1125	0.7042265	0.0	216.21057	221.00182	221.47998
39.431866	-5.0167108	2020224.1125	0.9756993	1.0	214.66408	218.3397	224.5835
40.959377	-4.3568273	2020224.1125	0.55420464	0.0	216.2277	218.86467	221.47998
40.72441	-4.293387	2020224.1125	0.82656807	1.0	214.76976	217.07108	221.73975
39.670765	-4.663673	2020224.1125	0.6646825	0.0	217.94606	219.4956	221.77295
46.298767	-2.6831033	2020225.1025	0.19044472	0.0	218.44122	219.45364	218.71553
47.111652	-1.2280395	2020225.1025	0.95854217	1.0	210.85905	214.64499	215.60567
46.850502	-1.1026243	2020225.1025	0.5743389	0.0	213.05223	216.32332	215.60567
41.258747	-43.71987	2020225.1345	0.6169393	1	214.07886	215.7953	214.57645
37.925934	-53.81197	2020226.1430	0.9857552	1.0	210.26668	215.86711	210.5296
7.2557383	33.08061	2020229.0835	0.86499184	0.0	192.81209	199.24632	195.72314
7.530131	33.43249	2020229.0835	0.8212794	0.0	191.45494	189.91904	195.72314
0.20934992	61.36878	2020232.0550	0.5806848	1	193.34798	197.4665	195.94168
-0.49899	61.311863	2020232.0550	0.5085693	0.0	194.4263	198.16121	195.87918
-0.40208817	62.094	2020232.0550	0.9894965	1.0	187.37123	193.62149	196.12137
0.47771022	62.613308	2020232.0550	0.7791441	0.0	193.87688	198.74005	196.66043
-1.1332878	62.51312	2020232.0550	0.6809558	0.0	191.45494	194.73401	196.15262
-0.10643132	62.991188	2020232.0550	0.9274714	1	190.65385	197.36548	196.66824
-0.7260825	62.945393	2020232.0550	0.90817785	1	188.65506	192.36833	196.50418
-0.5250961	63.00927	2020232.0550	0.9374117	1	189.18788	196.40857	196.50418
-3.3640144	62.407436	2020232.0550	0.7902031	1	192.86884	196.69739	196.96512
-3.0320399	62.78849	2020232.0550	0.9369751	1.0	189.74411	190.96779	196.8948
-2.7609413	62.99094	2020232.0550	0.68115944	0.0	194.39902	199.8779	196.72293
-2.230385	63.46014	2020232.0550	0.6673163	0.0	193.15137	198.01414	196.28543
-40.580956	-26.09722	2020241.1050	0.6468113	0.0	212.9612	213.6906	213.11916
-41.072144	-25.68867	2020241.1050	0.40228894	0.0	214.73457	215.74734	214.73634
43.986763	38.138348	2020275.0835	0.9796809	1.0	209.47221	212.74104	221.43048
43.405792	38.272484	2020275.0835	0.9993368	1.0	203.0668	207.7762	217.50616
43.952507	38.670006	2020275.0835	0.45292917	0.0	216.29616	218.42694	220.98615
42.500328	38.175537	2020275.0835	0.96779364	1.0	215.13805	218.98236	221.28534
10.444958	-5.8947906	2020275.1025	0.9909185	1.0	185.90654	192.30449	192.95944
44.207268	-6.67148	2020275.1150	0.75885624	0.0	208.04518	210.46269	208.40097
10.003132	-52.736034	2020275.1340	0.81246793	1.0	194.04247	197.57962	195.11005
47.816223	-76.73905	2020275.1650	0.2988169	0.0	224.58119	225.92029	225.84343
47.88412	-76.04103	2020275.1650	0.33860204	0.0	224.74309	226.19681	228.05046
48.029846	-75.2788	2020275.1650	0.6875827	0.0	224.64014	226.32582	229.20085
47.7793	-75.259285	2020275.1650	0.82235014	0.0	224.8312	228.31139	229.20085
39.287334	18.169844	2020276.0920	0.9658551	1.0	205.67467	210.68158	211.49487
40.020153	18.361069	2020276.0920	0.91764194	1.0	208.00496	210.97055	211.42456
47.88723	1.9746716	2020276.1055	0.19487037	0.0	220.44182	221.96046	221.31287
46.13784	1.388903	2020276.1055	0.14272016	0.0	227.96098	228.74812	228.04968
43.69337	0.6956143	2020276.1055	0.44175968	0.0	227.31705	227.95514	232.28796
46.698246	2.3496358	2020276.1055	0.13033767	0.0	222.5719	223.66579	222.99402
46.24698	2.3226094	2020276.1055	0.36926013	0.0	220.97801	222.49913	223.42468
8.146007	-42.508892	2020276.1245	0.9921349	1.0	190.59386	198.94156	194.1902
41.574413	-142.85504	2020276.2050	0.8938301	0.0	215.55582	216.2704	215.56714
44.95739	-141.11844	2020276.2050	0.57755816	0.0	216.60301	219.27979	217.38843
45.265728	-140.94736	2020276.2050	0.8151671	0.0	216.63698	217.97676	217.43726
44.47204	-141.2895	2020276.2050	0.61072576	0.0	216.67096	220.44434	217.59058
44.016968	-141.2496	2020276.2050	0.7709621	0.0	214.39886	215.75932	217.89331
43.63653	-141.40965	2020276.2050	0.6346916	0.0	214.48743	218.84856	215.9187
43.353745	-141.40793	2020276.2050	0.710283	0.0	214.06104	216.28217	215.9187
41.985897	-141.62802	2020276.2050	0.85330904	0.0	214.87526	217.63708	215.0476
42.617928	-141.27374	2020276.2050	0.54915845	0.0	213.9181	215.96849	214.70581
54.406044	159.73756	2020305.2335	0.50873256	0.0	211.21866	214.50082	211.32019
54.75178	159.89171	2020305.2335	0.5914479	0.0	209.64767	212.96834	210.42175
44.450825	172.66695	2020305.2335	0.5710384	0.0	215.74617	218.36697	216.78796
32.19471	-148.80542	2020306.2105	0.8793179	1.0	224.41887	228.18658	232.17862
29.036772	-147.35437	2020306.2105	0.39945337	0.0	222.99757	224.04462	226.49112
30.33656	-145.98764	2020306.2105	0.9999001	1.0	207.51941	213.69705	225.81339
29.441278	-146.21074	2020306.2105	0.9912907	1.0	212.5403	215.87904	225.99112
9.170811	-150.83772	2020310.2045	0.9552589	1.0	196.88971	199.4203	199.73727
8.368649	-155.43309	2020312.2035	0.71678674	1	193.7661	197.44131	196.1542
8.26545	-155.0216	2020312.2035	0.83998585	1.0	190.01927	193.33412	194.60733
7.7789807	-154.78842	2020312.2035	0.59308636	1	194.75247	200.13695	194.95108
7.670884	-154.20798	2020312.2035	0.5029255	1	194.31702	196.43498	196.9042
-25.852346	177.64413	2020318.2145	0.96071655	1.0	202.75272	206.93967	207.89886
-31.537468	155.86346	2020318.2325	0.9991817	1.0	214.45201	218.57362	234.38861
-31.732967	156.25519	2020318.2325	0.9980545	0.0	212.22699	213.7165	231.50189
-31.10596	156.90231	2020318.2325	0.9692035	0.0	218.06201	220.07173	228.8847
-32.708366	156.17746	2020318.2330	0.077384114	0.0	227.7797	228.44347	228.83002
-35.13122	158.39644	2020318.2330	0.59444845	0.0	221.29102	222.60754	224.72064
-34.804115	158.6078	2020318.2330	0.6498144	0.0	220.85231	222.96301	221.00189
-45.82961	168.03372	2020318.2330	0.43518254	0.0	215.24281	217.67067	215.86127
-45.21088	168.27052	2020318.2330	0.2930898	0.0	215.8842	218.22472	216.18256
-45.58733	168.23802	2020318.2330	0.56690675	0.0	214.48743	219.68895	215.93939
-33.538765	167.44426	2020319.2230	0.7845875	1.0	217.49652	219.98424	223.00018
-33.84796	167.65442	2020319.2230	0.43879983	0.0	220.15587	222.48495	224.9455
-44.86811	170.57002	2020321.2225	0.65918064	0.0	215.78073	217.98782	217.43669
-45.358562	170.48964	2020321.2225	0.49795336	0.0	217.59673	219.63683	217.9948
-27.854914	-40.91425	2020353.1225	0.8299231	1.0	206.80244	209.81718	210.65231
14.623986	-115.93196	2020353.1850	0.9995023	1.0	192.12485	198.65654	203.10449
-31.395056	-158.84001	2020353.2040	0.5560397	0.0	225.82076	226.7424	229.78787
-31.556923	-158.3144	2020353.2040	0.6721872	1.0	224.90454	226.35487	229.75272
-31.837435	-158.09552	2020353.2040	0.2551861	0.0	227.14792	228.886	228.866
-28.37585	-149.51178	2020354.1945	0.7109515	1	207.62097	211.1852	208.76877
-30.307594	-148.87315	2020354.1945	0.6208493	1	204.75691	205.38379	210.31955
-31.217108	-148.71364	2020354.1945	0.40675053	0.0	210.7259	213.1276	212.30978
-31.671242	-148.82675	2020354.1945	0.40131798	0.0	211.31288	213.98051	212.68088
41.474075	-138.45143	2020354.2100	0.73242754	0.0	212.9976	215.51228	213.11612
47.00215	-134.8387	2020354.2100	0.724577	0.0	210.74495	213.3516	212.71182
47.514244	-134.34657	2020354.2100	0.7987798	0.0	210.26668	215.06671	212.46964
47.240303	-134.48074	2020354.2100	0.89002174	0.0	210.43938	214.73235	212.34073
47.767544	-163.84995	2020356.2225	0.76316094	0.0	224.38928	226.46669	229.08325
43.406097	-166.99626	2020356.2230	0.27417713	0.0	228.59816	230.57793	230.552
45.25493	-165.95454	2020356.2230	0.47381365	0.0	226.62344	227.53891	229.03247
43.062893	-166.82532	2020356.2230	0.33524814	0.0	228.22499	229.65587	231.39575
47.2971	-163.3324	2020356.2230	0.43388683	0.0	225.22612	226.64804	228.66528
46.88349	-163.30196	2020356.2230	0.52652913	0.0	227.20435	230.8483	228.70825
46.256927	-162.89597	2020356.2230	0.5082777	0.0	227.76575	229.49142	228.95825
39.6447	-160.02274	2020357.2135	0.48087862	0.0	228.12787	229.59244	231.81216
41.0724	-159.11443	2020357.2135	0.9505424	1.0	225.9793	227.5828	230.73013
39.855038	-159.38548	2020357.2135	0.87169564	0.0	222.61765	223.6794	231.53482
47.328564	-178.94019	2020357.2310	0.74451596	0.0	220.58424	222.21436	221.01802
47.959873	-178.2717	2020357.2310	0.926268	1	218.22722	221.12585	220.22017
42.713585	-179.78685	2020357.2310	0.33694774	0.0	227.84949	230.68274	228.05806
47.695477	-176.6473	2020357.2310	0.7974206	0.0	218.67078	221.83997	221.36372
47.867783	-176.19417	2020357.2310	0.6948274	0.0	219.5634	221.34294	221.05904
48.046574	-175.45245	2020357.2310	0.61694956	0.0	220.55261	223.4471	222.09908
47.59785	-175.51973	2020357.2310	0.6623351	0.0	220.97801	224.30339	221.52974
47.829285	-174.74873	2020357.2310	0.8645421	0.0	219.28905	222.53218	222.71236
47.496353	-174.86047	2020357.2310	0.597842	0.0	219.48283	222.36185	220.60103
49.016468	-173.40648	2020357.2310	0.7496049	0.0	218.0289	221.77225	221.19868
49.138107	-172.81114	2020357.2310	0.9392849	1	216.24484	223.60217	221.4311
12.064978	114.10579	2020358.0240	0.7814633	1.0	189.09438	186.44472	189.24582
33.06787	-169.72232	2020359.2125	0.6374533	0.0	219.75624	220.96695	222.88196
53.931072	-9.740183	2020362.1155	0.50952864	0.0	221.74187	223.57486	223.5452
53.219902	-9.748192	2020362.1155	0.4934289	0.0	222.0199	223.4288	222.64676
53.936718	-9.362478	2020362.1155	0.64448285	0.0	220.3149	222.3096	222.46512
54.422462	-8.58908	2020362.1155	0.90344745	1	217.76334	220.7721	222.48856
55.30948	-7.861188	2020362.1155	0.9596194	1	217.66344	220.48488	222.63309
54.779316	-7.5759234	2020362.1155	0.5174872	0.0	218.63805	221.11101	220.85184
55.52801	130.99953	2020364.0150	0.71517897	0.0	219.78831	222.51804	220.79797
59.133045	139.25537	2020364.0150	0.9419851	0.0	222.18912	233.24718	222.34875
59.67892	139.75613	2020364.0150	0.9869321	0.0	221.16603	233.7299	222.79993
55.660282	116.55429	2020365.0235	0.9634748	0.0	207.31564	212.6199	208.62805
57.057144	120.18635	2020365.0235	0.7826844	0.0	216.09056	218.62233	218.31165
