# Supplementary material for: Near-global distributions of overshooting tops derived from Terra and Aqua MODIS observations
Source: Copernicus journal article supplement (doi:10.5194/amt-16-1391-2023), 2023-03-16
Supplement: Supplementary file 1 [file File S1.docx]

Several OT and NOT cases identified from A-Train satellites.


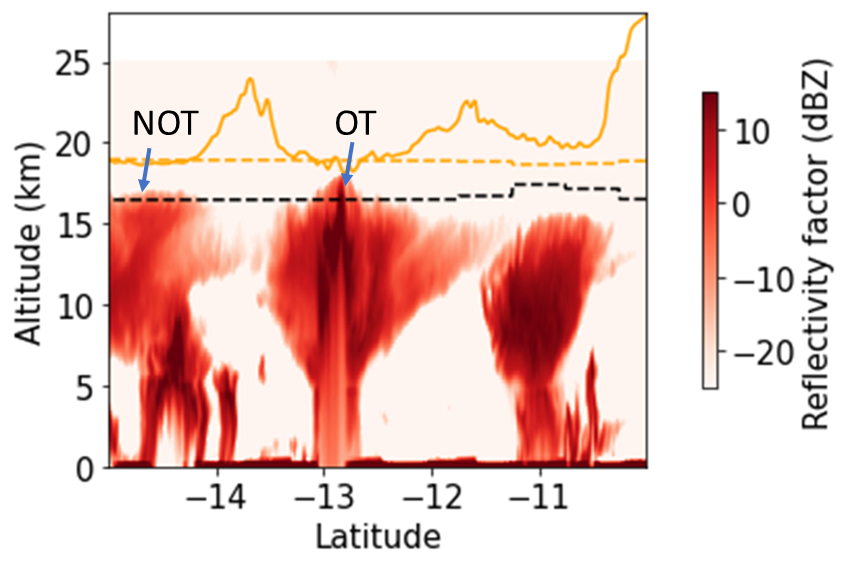


Case 1: 2007024(yearday) over Pacific Ocean, Lat ~ -12.7951, Lon ~ -164.2836. Black dashed line is for tropopause height, orange dashed line is for tropopause temperature/10.0, and orange solid line is for Tb11/10.


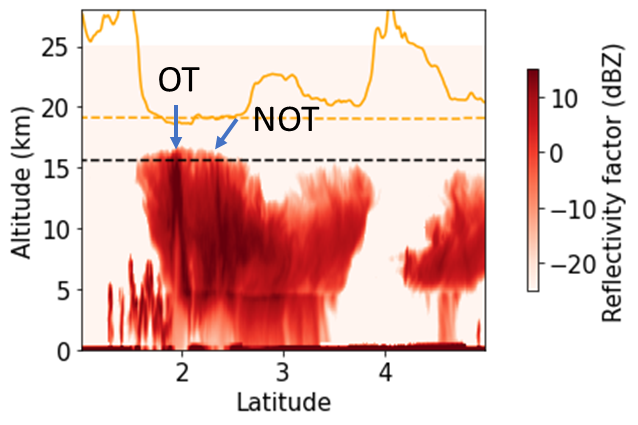


Case 2: 2007159 over Pacific Ocean, Lat ~ 2.0908, Lon ~ 147.8722.


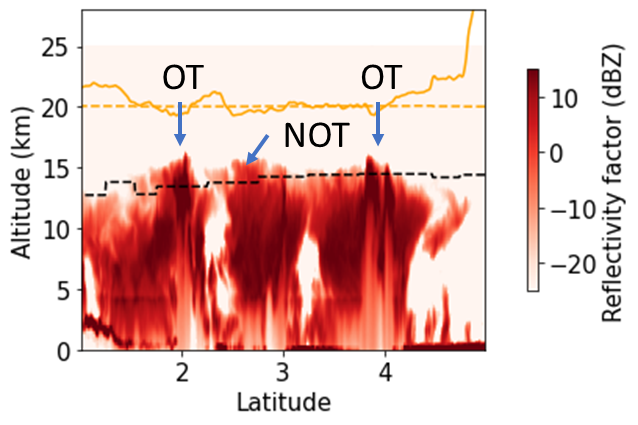


Case 3: 2007206 over Norwest of South America, Lat ~ 2.0537, Lon ~ -77.7032.
